# Supplementary material for: Is Empathy for Pain Unique in Its Neural Correlates? A Meta-Analysis of Neuroimaging Studies of Empathy
Source: PubMed Central journal article supplement (PMC6277791; doi:10.3389/fnbeh.2018.00289), 2018-11-27
Supplement: Table_1.pdf [file Table_1.pdf]

**TABLE S1** | Overview and characteristics of all studies included in the meta-analysis

| Paper                   | Field strength | Participants (Female) | Smoothing level (mm) | Type of stimuli                                                         | Affective / sensory state targeted  | Cognitive/evaluative or affective/perceptual | If C/E: task                                                  | Relevant contrast(s)                                                         |
|-------------------------|----------------|-----------------------|----------------------|-------------------------------------------------------------------------|-------------------------------------|----------------------------------------------|---------------------------------------------------------------|------------------------------------------------------------------------------|
| Akitsuki et al., 2009   | 3T             | 26 (14F)              | 6                    | Pain infliction to body part (animated)                                 | Pain                                | A/P                                          |                                                               | Pain > no pain                                                               |
| Arbuckle et al., 2017   | 3T             | 26 (1F)               | 9                    | Pain infliction to body part (animated)                                 | Pain                                | C/E                                          | Rate pain experienced by other person                         | Pain > no pain                                                               |
| Azevedo et al., 2013    | 3T             | 27 (16F)              | 8                    | Pain infliction to body part (animated)                                 | Pain                                | A/P                                          |                                                               | Pain > no pain                                                               |
| Azevedo et al., 2014    | 3T             | 12 (12F)              | 8                    | Pain infliction to body part (animated) plus facial pain expression     | Pain                                | A/P                                          |                                                               | Pain > no pain                                                               |
| Aziz-Zedah et al., 2012 | 3T             | 13 (13F)              | 7.5                  | Pain infliction to body part (animated)                                 | Pain                                | A/P                                          |                                                               | Pain > no pain                                                               |
| Bagozzi et al., 2013    | 3T             | 24 (8F)               | 8                    | Facial expressions (photos)                                             | Anger, disgust, happiness, surprise | A/P                                          |                                                               | Negative (angry, disgust) > neutral<br>Positive (happy, surprised) > neutral |
| Benuzzi et al., 2008    | 3T             | 15 (15F)              | 6x6x9                | Pain infliction to body part (animated), as well as disgusting stimulus | Pain, disgust                       | C/E                                          | Rate unpleasantness of videos                                 | Pain > neutral<br>Disgust > neutral                                          |
| Berlingeri et al., 2016 | 1.5T           | 25 (13F)              | 8                    | Pain infliction to body part (animated)                                 | Pain                                | C/E                                          | Rate pain experienced by other person                         | Pain > no pain                                                               |
| Bodden et al., 2013     | 1.5T           | 30 (15F)              | 8                    | Drawings of faces                                                       | Undefined                           | C/E                                          | Affective ToM: complete sentences by inferring affect of face | Emotional > control (physical causality inference)                           |
| Bos et al., 2015        | 3T             | 24 (0F)               | 8                    | Pain infliction to body part (animated)                                 | Pain                                | A/P                                          |                                                               | Pain > no pain                                                               |

|                                 |       |           |     |                                                                             |                                             |     |                                                                                       |                                                                        |
|---------------------------------|-------|-----------|-----|-----------------------------------------------------------------------------|---------------------------------------------|-----|---------------------------------------------------------------------------------------|------------------------------------------------------------------------|
| Botvinick et al., 2005          | 1.5 T | 12 (12F)  | 12  | Facial expressions (video clips)                                            | Pain                                        | A/P |                                                                                       | Pain > neutral                                                         |
| Bruneau et al., 2012            | 3T    | 49 (18F)  | 5   | Written scenarios                                                           | Pain, emotional pain (suffering)            | C/E | Rate compassion felt for the protagonist                                              | Pain > neutral<br>Emotional pain > neutral                             |
| Bruneau et al., 2012            | 3T    | 41 (25F)  | 5   | Written scenarios                                                           | Pain, emotional pain (suffering)            | C/E | Rate pain intensity or actively empathize (results are collapsed across instructions) | Pain > neutral<br>Emotional pain > neutral                             |
| Brunnlieb et al., 2013          | 3T    | 18 (0F)   | 8   | Drawings                                                                    | Anger, sadness, pain, anxiety               | C/E | Imagine how they would feel                                                           | Negative emotion/pain > neutral                                        |
| Budell et al., 2010             | 3T    | 18 (9F)   | 8   | Facial expressions (video clips)                                            | Pain                                        | C/E | Rate pain intensity                                                                   | Pain > no pain                                                         |
| Cheng et al., 2007              | 3T    | 14 (7F)   | 8   | Pain infliction to body part (animated)                                     | Pain                                        | A/P |                                                                                       | Pain > no pain                                                         |
| Cheng et al., 2010              | 3T    | 36 (18F)  | 8   | Pain infliction to body part (animated)                                     | Pain                                        | C/E | Observe scenes with perspective of loved one or stranger                              | Pain loved one > no pain loved one<br>Pain stranger > no pain stranger |
| Chiao et al., 2009              | NR    | 14 (14F)  | 8   | Natural scenes (faces plus context)                                         | Emotional pain (suffering)                  | A/P |                                                                                       | Emotional Pain > no pain                                               |
| Cheon et al., 2013              | 3T    | 27 (5F)   | 8   | Natural scenes (faces plus context)                                         | Emotional pain (suffering)                  | A/P |                                                                                       | Emotional Pain > no pain                                               |
| Choe et al., 2015               | 3T    | 178 (0F)  | 6   | Facial expressions (photos)                                                 | Fear, anger                                 | C/E | Select the face identical to the target face                                          | Fear > control<br>Anger > control                                      |
| Coll et al., 2017               | 3T    | 30 (20 F) | 8   | Facial expressions (video clips)                                            | Pain                                        | A/P |                                                                                       | Pain > no pain                                                         |
| Corradi-Dell'Acqua et al., 2011 | 3T    | 28 (28F)  | 8   | Pain infliction to body part (photos)                                       | Pain                                        | A/P |                                                                                       | Pain > no pain                                                         |
| Danziger et al., 2009           | 1.5T  | 13 (7F)   | 8   | Pain infliction to body part (cue; photos) plus facial expressions (photos) | Pain                                        | C/E | Imagine how the other person feels                                                    | Pain > no pain (cue)<br>Pain > no pain (face)                          |
| Dapretto et al., 2006           | 3T    | 10 (1F)   | AIR | Facial expressions (photos)                                                 | Anger, fear, happiness, neutrality, sadness | A/P |                                                                                       | Emotional > baseline                                                   |
| De Greck et al., 2012a          | 1.5T  | 20 (12F)  | 6   | Facial expressions (photos)                                                 | Anger, disgust, happy, neutral              | C/E | Empathize with person in photo                                                        | Anger > control<br>Disgust > control<br>Joy > control                  |

|                        |      |          |    |                                                      |                                                              |     |                                                                                         |                                            |
|------------------------|------|----------|----|------------------------------------------------------|--------------------------------------------------------------|-----|-----------------------------------------------------------------------------------------|--------------------------------------------|
| De Greck et al., 2012b | 3T   | 20 (11F) | 8  | Facial expressions (photos)                          | Anger                                                        | C/E | Empathize with person in photo                                                          | Anger > baseline                           |
| Decety et al., 2008    | 3T   | 17 (9F)  | 6  | Pain infliction to body part (animated)              | Pain                                                         | A/P |                                                                                         | Pain > no pain                             |
| Decety et al., 2009    | 3T   | 8        | 6  | Pain infliction to body part (animated)              | Pain                                                         | A/P |                                                                                         | Pain > no pain                             |
| Decety et al., 2010    | 3T   | 57 (28F) | 6  | Pain infliction to body part (animated)              | Pain                                                         | A/P |                                                                                         | Pain > no pain                             |
| Deeley et al., 2006    | 1.5T | 9 (0F)   | NR | Facial expressions (photos)                          | Fear                                                         | A/P |                                                                                         | Fear > neutral<br><i>Neutral &gt; fear</i> |
| De Gelder et al., 2004 | 3T   | 7 (3F)   | 6  | Emotionally expressive gestures (photos)             | Fear, happy                                                  | A/P |                                                                                         | Fear > neutral<br>Happy > neutral          |
| Dong et al., 2016      | 3T   | 36 (0F)  | 6  | Facial expressions (photos)                          | Pain                                                         | C/E | Evaluate whether person is experiencing pain                                            | Pain > no pain                             |
| Enzi et al., 2016      | 3T   | 20 (0F)  | 8  | Pain infliction to body part (animated)              | Pain                                                         | C/E | Evaluate whether person is experiencing pain                                            | Pain > no pain                             |
| Ernst et al., 2013     | 3T   | 18 (12F) | 8  | Facial expressions (photos)                          | Happiness, sadness, disgust, fear, surprise, anger, contempt | A/P |                                                                                         | Emotional (all together) > control         |
| Fan et al., 2014       | 3T   | 21 (0 F) | 10 | Pain infliction to body part (photos)                | Pain                                                         | C/E | Evaluate whether photo depicts pain                                                     | Pain > no pain                             |
| Feng et al., 2016      | 3T   | 22 (11F) | 5  | Pain infliction to body part (including face; photo) | Pain                                                         | C/E | Empathize and rate how much pain other person experiences                               | Pain > no pain<br><i>No pain &gt; pain</i> |
| Fourie et al., 2017    | 3T   | 38 (21F) | NR | Facial expressions (video clips)                     | Pain, emotional pain (distress)                              | C/E | Empathize with person in video clip and for emotional pain: rate their empathic concern | Pain > no pain<br>Social pain > no pain    |
| Fujino et al., 2014    | 3T   | 11 (9F)  | NR | Pain infliction to body part (animated)              | Pain                                                         | A/P |                                                                                         | Pain > no pain                             |
| Gao et al., 2017       | 3T   | 35 (0F)  | 6  | Pain infliction to body part (photos)                | Pain                                                         | C/E | Rate how much pain other person experiences                                             | Pain > no pain                             |

|                              |      |                    |    |                                                            |                               |      |                                                                       |                                                                                                          |
|------------------------------|------|--------------------|----|------------------------------------------------------------|-------------------------------|------|-----------------------------------------------------------------------|----------------------------------------------------------------------------------------------------------|
| Geday et al., 2003           | PET  | 9 (0F)             | NR | Facial expressions and complex social scenes (photos)      | Sadness, disgust (unpleasant) | A/P  |                                                                       | Unpleasant > neutral<br><i>Neutral &gt; unpleasant</i>                                                   |
| Geday et al., 2007           | PET  | 14 (7F)            | 12 | Faces plus context (photos)                                | Positive and negative         | A/P  |                                                                       | Emotional (taken together) > neutral                                                                     |
| Göttlich et al., 2017        | 3T   | 26 (20 F)          | 8  | Drawings                                                   | Distress                      | A/P  |                                                                       | Distress > neutral                                                                                       |
| Greimel et al., 2010         | 1.5T | 47 (0 F)           | 8  | Facial expressions (photos)                                | Happy, sad, neutral           | C/E  | Infer emotional state of other and evaluate own state (self)          | Emotional (other) > neutral<br>Emotional (self) > neutral                                                |
| Grice-Jackson et al., 2017   | 1.5T | 21<br>13<br>10     | 8  | Pain infliction to body part (photo)                       | Pain                          | C/E  | Evaluate whether they experience any pain while observing             | Pain > no pain (control)<br>Pain > no pain (sensory responders)<br>Pain > no pain (affective responders) |
| Grosbras et al., 2006        | 1.5T | 20 (10F)           | 6  | Facial expressions, hand movements (video clips)           | Anger                         | A/P  |                                                                       | Angry > control (face)<br>Angry > control (hand)                                                         |
| Gu et al., 2010              | 3T   | 18 (9F)            | 8  | Pain infliction to body part (photo)                       | Pain                          | Both | Evaluate whether another is in pain or not; or evaluate laterality    | Pain > no pain                                                                                           |
| Gu et al., 2013              | 3T   | 18 (9F)            | 8  | Pain infliction to body part (photo)                       | Pain                          | C/E  | Evaluate whether other person experiences pain or evaluate laterality | Pain (instructions collapsed) > no pain<br><i>No pain &gt; pain</i>                                      |
| Hadjikhani et al., 2014      | 3T   | 31 (3 F)           | 8  | Facial expressions (photos)                                | Pain                          | A/P  |                                                                       | Pain > no pain                                                                                           |
| Han et al., 2009             | 3T   | 24 (12F), 22 (11F) | 8  | Pain infliction to body part (photos)                      | Pain                          | A/P  |                                                                       | Pain > no pain (group 1)<br>Pain > no pain (group 2)                                                     |
| Han et al., 2017             | 3T   | 33 (16F)           | 8  | Pain infliction to body part (videos)                      | Pain                          | A/P  |                                                                       | Pain > no pain (passive)<br>Pain > no pain (button press)                                                |
| Horan et al., 2014           | 3T   | 23 (16F)           | 6  | Facial expressions (photos)                                | Happy, Sad, Angry, and Afraid | A/P  |                                                                       | Emotional > baseline                                                                                     |
| Jackson et al., 2017         | 4T   | 51 (51F)           | 8  | Facial expressions (video clips)                           | Pain                          | C/E  | Rate how much pain other person experiences                           | Infant pain > no pain<br>Adult pain > no pain<br>Adult pain > no pain (nurses)                           |
| Jankowiak-Siuda et al., 2015 | 3T   | 27 (14F)           | 8  | Facial expressions plus pain infliction (series of photos) | Pain                          | C/E  | Rate how much compassion they feel for other person                   | Pain > no pain                                                                                           |

|                       |      |                        |   |                                                                    |                                            |      |                                                                                              |                                                              |
|-----------------------|------|------------------------|---|--------------------------------------------------------------------|--------------------------------------------|------|----------------------------------------------------------------------------------------------|--------------------------------------------------------------|
| Jensen et al., 2014   | 3T   | 18 (10 F)              | 8 | Real life (participant sees face of patient and the heat thermode) | Pain                                       | A/P  |                                                                                              | Pain > no pain<br>No pain > pain                             |
| Kana et al., 2016     | 3T   | 15                     | 8 | Emotional facial/body expressions in social interactions           | Happy, Sad, Angry, and Afraid              | C/E  | Choose correct emotion of blurred face in interaction                                        | Emotional (all collapsed) > neutral                          |
| Kanske et al., 2015   | 3T   | 25 (14F)<br>178 (102F) | 8 | Facial expressions (video clips)                                   | Negative emotions                          | C/E  | Rate how they feel and how much compassion they feel                                         | Negative emotion > neutral<br>Negative emotion > neutral     |
| Kim et al., 2009a     | 3T   | 21 (12 F)              | 7 | Facial expressions (photos)                                        | Sad, neutral                               | Both | View passively or with an active compassionate attitude                                      | Sad (collapsed both instructions) > neutral                  |
| Kim et al., 2009b     | 1.5T | 14 (6F)                | 9 | Facial expressions and emotional story (video clips)               | Angry, happy                               | C/E  | Make inferences about what happened (given the emotional cues)                               | Angry > control<br>Happy > control                           |
| Kim et al., 2010      | 3T   | 19 (0 F)               | 8 | Drawings                                                           | Not specified                              | C/E  | Make inference about what characters feels                                                   | Empathy > control (physical causality inference)             |
| Kim et al., 2011      | 3T   | 19 (0 F)               | 8 | Emotional scenes (IAPS)                                            | Threats (of natural and artificial origin) | C/E  | Match the target to two choice stimuli                                                       | Negative emotion > control                                   |
| Klimecki et al., 2013 | 3T   | 94 (94F)               | 6 | Emotional scenes (video clips)                                     | Distress                                   | C/E  | Rate how much empathy, positive and negative affect they experienced                         | High distress > control<br><i>Control &gt; high distress</i> |
| Krach et al., 2015    | 3T   | 16 (0F)                | 8 | Pain infliction to body part (photos)<br>Drawings                  | Pain, social pain (embarrassment)          | C/E  | Evaluate how much pain other person experiences<br>Evaluate level of vicarious embarrassment | Pain > no pain<br>Social pain > no pain                      |
| Kramer et al., 2010   | 3T   | 16 (10F)               | 8 | Drawings                                                           | Anger, sadness, pain, anxiety              | A/P  |                                                                                              | Emotional > neutral<br><i>Neutral &gt; emotional</i>         |
| Labek et al., 2017    | 3T   | 17 (14 F)              | 8 | Drawings                                                           | Negative (mourning)                        | A/P  |                                                                                              | Negative emotion > control                                   |
| Lamm et al., 2008     | 3T   | 18 (9F)                | 6 | Pain infliction to body part (photos)                              | Pain                                       | C/E  | Evaluate amount of pain inflicted                                                            | Pain > no pain                                               |
| Lang et al., 2011     | 3T   | 22 (13 F)              | 8 | Auditory stimuli                                                   | Negative emotions                          | A/P  |                                                                                              | Negative > control<br><i>Control &gt; negative</i>           |

|                         |      |                                        |    |                                                               |                                                 |     |                                                |                                                                                                                                  |
|-------------------------|------|----------------------------------------|----|---------------------------------------------------------------|-------------------------------------------------|-----|------------------------------------------------|----------------------------------------------------------------------------------------------------------------------------------|
| Lee et al., 2006        | 1.5T | 14 (1 F)                               | 8  | Written scenarios                                             | Distress                                        | C/E | Answer questions on empathy-related info       | Distress > neutral                                                                                                               |
| Lee et al., 2010        | 1.5T | 18 (9 F)                               | 9  | Drawings (comic strips)                                       | Happiness, fear, anger, physical distress, pity | C/E | Choose correct ending to story                 | Empathy inference > control (physical causality inference)                                                                       |
| Lee et al., 2013        | 3T   | 12 (12F)                               | 8  | Facial expressions (video clips)                              | Happy, sad, fearful, and neutral                | A/P |                                                | Emotional > neutral                                                                                                              |
| Leiberg et al., 2012    | 1.5T | 24 (24F)                               | 12 | Emotional scenes (IAPS)                                       | Negative                                        | A/P |                                                | Emotional > neutral                                                                                                              |
| Lenzi et al., 2013      |      | 23 (23F)                               | 8  | Facial expressions (photos)                                   | Joy and distress                                | C/E | Watch or imitate and empathize with the faces  | Joy/Distress (collapsed across instructions) > neutral                                                                           |
| Luo et al., 2014        | 3T   | 36                                     | 8  | Pain infliction to body part (video)                          | Pain                                            | C/E | Evaluate whether other person experiences pain | Pain > no pain                                                                                                                   |
| Luo et al., 2015        | 3T   | 30 (A/A genotype)<br>30 (G/G genotype) | 8  | Pain infliction to body part (video) using two type of models | Pain                                            | C/E | Evaluate whether other person experiences pain | Pain > no pain (A/A, model A)<br>Pain > no pain (A/A, model B)<br>Pain > no pain (G/G, model A)<br>Pain > no pain (G/G, model B) |
| Mascaro et al., 2014    | 3T   | 36                                     | 8  | Infant crying (auditory)                                      | Negative / Distress                             | A/P |                                                | Distress > control                                                                                                               |
| Mathur et al., 2010     | 3T   | 28                                     | 8  | Facial expressions in natural scenes (photos)                 | Negative                                        | C/E | Rate the level of experienced empathy          | Emotional pain > neutral                                                                                                         |
| Mathur et al., 2016     | 3T   | 15                                     | 8  | Facial expressions in natural scenes (photos)                 | Negative                                        | C/E | Rate the level of experienced empathy          | Emotional pain > neutral                                                                                                         |
| Mazza et al., 2013      | 1.5T | 10 (10F)                               | NR | Emotional scenes                                              | Negative emotions                               | A/P |                                                | Negative emotion > control                                                                                                       |
| Mazzola et al., 2010    | 3T   | 30                                     | 10 | Facial expressions (photos)                                   | Negative                                        | A/P |                                                | Pain > no pain                                                                                                                   |
| Melchers et al., 2015   | 1.5T | 60                                     | 8  | Stills from a video on embarrassing scenes                    | Vicarious embarrassment                         | A/P |                                                | Vicarious embarrassment > neutral                                                                                                |
| Mercadillo et al., 2011 | 3T   | 24 (12F)                               | NR | Emotional scenes (photos)                                     | Suffering                                       | C/E | Indicate how much compassion they feel         | Suffering > neutral social scenes                                                                                                |
| Mercadillo et al., 2015 | 3T   | 24 (12F)                               | NR | Emotional scenes (photos)                                     | Suffering                                       | C/E | Indicate how much compassion they feel         | Suffering > neutral social scenes                                                                                                |
| Michalska et al., 2013  | 3T   | 65                                     | 6  | One person hurting another (video clip)                       | Pain                                            | A/P |                                                | Pain > no pain                                                                                                                   |

|                          |      |                                 |    |                                                                                                 |                      |     |                                                                                          |                                                                                                                                                                        |
|--------------------------|------|---------------------------------|----|-------------------------------------------------------------------------------------------------|----------------------|-----|------------------------------------------------------------------------------------------|------------------------------------------------------------------------------------------------------------------------------------------------------------------------|
| Molenberghs et al., 2016 | 3T   | 48                              | 6  | One person hurting another (photo)                                                              | Pain                 | A/P |                                                                                          | Pain > no pain                                                                                                                                                         |
| Moll et al., 2007        | 1.5T | 12 (6F)                         | 8  | Scenarios (written)                                                                             | Compassion           | A/P |                                                                                          | Compassion > neutral                                                                                                                                                   |
| Montoya et al., 2012     | 3T   | 17 (17F)                        | 6  | Crying (auditory)                                                                               | Distress, happy, sad | A/P |                                                                                          | Happy > neutral<br>Neutral > happy<br>Sad > neutral<br>Neutral > sad<br>Low distress > noise<br>Noise > low distress<br>High distress > noise<br>Noise > high distress |
| Morelli et al., 2014     | 3T   | 32                              | 8  | Facial/Body expression (photos)                                                                 | Happy, anxiety, pain | C/E | Empathize with individuals on photos                                                     | Anxiety > neutral<br>Happy > neutral<br>Pain > no pain                                                                                                                 |
| Moriguchi et al., 2007   | 1.5T | 14                              | 6  | Pain infliction to body part (photo)                                                            | Pain                 | C/E | Evaluate how much pain other person experiences                                          | Pain > no pain                                                                                                                                                         |
| Morrison et al., 2004    |      | 14                              | 5  | Pain infliction to body part (photo)                                                            | Pain                 | A/P |                                                                                          | Pain > rest                                                                                                                                                            |
| Morrison et al., 2007a   | 1.5T | 12 (5F)                         | NR | Pain infliction to body part (photos)                                                           | Pain                 | A/P |                                                                                          | Pain > no pain                                                                                                                                                         |
| Morrison et al., 2007b   | 1.5T | 16 (8F)                         | 6  | Pain infliction to body part (photo)                                                            | Pain                 | C/E | Press button when nature of photo was discerned                                          | Pain > no pain                                                                                                                                                         |
| Morrison et al., 2013    | 1.5T | 14 (7F)                         | 6  | Pain infliction to body part (photo; grasping or withdrawing from noxious or innocuous stimuli) | Pain                 | C/E | Evaluate whether grasp or withdrawal was appropriate given noxious or innocuous stimulus | Pain > no pain                                                                                                                                                         |
| Nomi et al., 2008        | 1.5T | 14 (7F)                         | 10 | Facial expressions (photos)                                                                     | Happy, sad, neutral  | C/E | Instructed to recognize and share emotion                                                | Emotional > control                                                                                                                                                    |
| Nummenmaa et al., 2008   |      | 10 (10F)                        | 8  | Aversive threatening scenes (photos)                                                            | Negative             | C/E | Empathize with aggressor or victim                                                       | Emotional > neutral                                                                                                                                                    |
| Osborn et al., 2010      | 3T   | Resp: 10 (6F); non-resp 10 (6F) | 6  | Scenes (faces plus context)                                                                     | Pain                 | A/P |                                                                                          | Pain > control (resp)<br>Pain > control (non-resp)<br>Control > pain (non-resp)                                                                                        |

|                             |      |          |        |                                                   |                                         |            |                                                   |                                                                      |
|-----------------------------|------|----------|--------|---------------------------------------------------|-----------------------------------------|------------|---------------------------------------------------|----------------------------------------------------------------------|
| Paulus et al., 2017         | 3T   | 17 (0F)  | 8      | Drawings                                          | Empathic embarrassment                  | C/E        | Rate how much vicarious embarrassment they felt   | Empathic embarrassment > neutral                                     |
| Pehrs et al., 2017          | 3T   | 26 (17F) | 6      | Empathic film with sad music                      | Sadness                                 | C/E        | Rate 'moving' feeling and level of compassion     | Sad > neutral                                                        |
| Powell et al., 2017         | 3T   | 12 (0F)  | 6      | Drawings (comic strip)                            | Does not specify                        | C/E        | Asked to choose the right ending to the comic     | Empathic inference > control (physical causality inference)          |
| Preis et al., 2013          | 3T   | 64 (32F) | 8      | Pain infliction to body part (photo)              | Pain                                    | C/E        | Imagine how the person in photo feels             | Pain > no pain<br><i>No pain &gt; pain</i>                           |
| Preston et al., 2007        | PET  | 16 (8F)  | 16     | Emotional scenarios (imagining)                   | Fear or anger                           | C/E        | Imagine emotional scenarios                       | Emotional > neutral (personal)<br>Emotional > neutral (non-personal) |
| Prochnow et al., 2013       | 3T   | 15 (7F)  | 8      | Facial expressions (video clips)                  | Anger, sadness, fear, disgust, surprise | C/E        | Rate the emotion in the video clip                | Emotional > control                                                  |
| Prochnow et al., 2014       | 3T   | 26 (12F) | 6      | Facial expressions (photos)                       | Happiness, anger, sadness, fear         | C/E        | Match descriptive sentences to facial expressions | Emotional > control                                                  |
| Regenbogen et al., 2012     | 3T   | 27 (13F) | 8      | Facial expressions and descriptions (video clips) | Disgust, fear, happy, sad               | A/P        |                                                   | Emotional vs. neutral                                                |
| Reniers et al., 2014        | 3T   | 15 (0F)  | 7x7x10 | Emotional scenes                                  | Sad vs. neutral                         | C/E        | Imagine what another is feeling                   | Sad > neutral                                                        |
| Riecki et al., 2017         | 3T   | 38 (19F) | 8      | Facial expressions (photos)                       | Pain, injury, grief                     | A/P<br>C/E | n/a<br>Rate how emotionally touching the photo is | Emotional > neutral (passive)<br>Emotional > neutral (active)        |
| Riem et al., 2011           | 3T   | 42 (42F) | 5      | Crying (auditory)                                 | Distress                                | A/P        |                                                   | Distress > neutral                                                   |
| Ruckmann et al., 2015       | 3T   | 30 (15F) | 8      | Pain infliction to body part (photo)              | Pain                                    | C/E        | Rate the pain level of people in photo            | Pain > no pain                                                       |
| Schneider et al., 2013      | 3T   | 28 (13F) | 8      | Emotional videos                                  | Disgust, happiness, fear, anger         | C/E        | Asked about what they felt and what other felt    | Emotional > neutral                                                  |
| Schulte-Ruther et al., 2008 | 1.5T | 26 (14F) | NR     | Facial expressions (photos)                       | Fear, anger                             | C/E        | Self-evaluated how they felt                      | Fear/Anger > Neutral (self)<br>Fear/Anger > Neutral (other)          |



|                              |      |          |    |                                                   |                                    |     | Other-evaluated how the person in the picture felt |                                                              |
|------------------------------|------|----------|----|---------------------------------------------------|------------------------------------|-----|----------------------------------------------------|--------------------------------------------------------------|
| Seara-Cardoso et al., 2015   | 1.5T | 46 (0F)  | 8  | Pain infliction to body part (photo)              | Pain                               | A/P |                                                    | Pain > no pain                                               |
| Seara-Cardoso et al., 2016   | 1.5T | 31 (0F)  | 8  | Facial expressions (photos)                       | Sad, fearful, angry, happy         | A/P |                                                    | Emotional > neutral                                          |
| Sebastian et al., 2012       | 1.5T | 30 (0F)  | 8  | Drawings (comic strips)                           | Not specified                      | C/E | Choose proper ending to comic strip                | Emotional inference > control (physical causality inference) |
| Sheng et al., 2014           | 3T   | 21 (11F) | 8  | Facial expressions (photos)                       | Pain                               | C/E | Judge whether or not the other person is in pain   | Pain > no pain                                               |
| Simon et al., 2006           | 1.5T | 17 (9F)  | 10 | Facial expressions (photos)                       | Pain, anger                        | A/P |                                                    | Pain > no pain<br>Angry > neutral                            |
| Simon-Thomas et al., 2012    | 4T   | 17 (11F) | 8  | Emotional scenes (photos)                         | Compassion/<br>distress            | C/E | Rate their emotional response to scenes            | Distress > neutral                                           |
| Singer et al., 2004          | 1.5T | 16 (16F) | 10 | Real life (heat probe on hand in mirror)          | Pain                               | A/P |                                                    | Pain > no pain                                               |
| Singh et al., 2015           | 3T   | 14 (4F)  | 6  | Emotional scenes (photos)                         | Suffering/distress                 | C/E | Rate their emotional response to scenes            | Suffering > neutral                                          |
| Spencer et al., 2011         | 3T   | 40 (20F) | 10 | Facial expressions (photos)                       | Fear, happiness                    | A/P |                                                    | Happy > neutral<br>Fear > neutral                            |
| Szicik et al., 2017          | 3T   | 30 (0F)  | 8  | Drawings                                          | Distress                           | C/E | Imagine how they would feel in situation           | Distress > neutral                                           |
| Toller et al., 2015          | 3T   | 30 (17F) | 4  | Facial expressions (video clips)                  | Fear                               | A/P |                                                    | Fear > control                                               |
| Tusche et al., 2016          | 3T   | 31 (15F) | 8  | Facial expressions and descriptions (video clips) | Negative                           | C/E | Rate their own affect and compassion               | Emotionally negative > neutral                               |
| Ushida et al., 2008          | 1.5T | 15 (8F)  | 8  | Pain infliction to body part (photos)             | Pain/fear                          | A/P |                                                    | Pain > no pain                                               |
| Vachon-Presseau et al., 2012 | 3T   | 20 (10F) | 6  | Pain infliction to body part (photo)              | Pain                               | C/E | Evaluate whether person is in pain or not          | Pain > no pain                                               |
| Van der Heiden et al., 2013  | 1.5T | 18 (9F)  | 8  | Pain infliction to body part (photo)              | Pain                               | A/P |                                                    | Pain > no pain                                               |
| Vollm et al., 2006           | 1.5T | 13 (0F)  | 10 | Drawings (comic strip)                            | Emotion - doesn't specifically say | C/E | Imagine how main character feels                   | Empathic inference > control (physical causality inference)  |

|                     |    |          |    |                                              |                                              |               |                                           |                                                             |
|---------------------|----|----------|----|----------------------------------------------|----------------------------------------------|---------------|-------------------------------------------|-------------------------------------------------------------|
| Wang et al., 2015   | 3T | 56 (25F) | 10 | Drawings (comic strip)                       | Not specified                                | C/E           | Infer proper ending to the comic strip    | Empathic inference > control (physical causality inference) |
| Warren et al., 2006 | 3T | 20 (12F) | 8  | Nonverbal vocal expressions (auditory)       | Positive (triumph), negative (fear, disgust) | A/P           |                                           | Emotion > baseline                                          |
| Wicker et al., 2003 | 3T | 14 (0F)  | 6  | Facial expressions (video clips) plus scents | Disgust, pleasure                            | Not specified |                                           | Disgust > neutral<br>Pleasure > neutral                     |
| Xu et al., 2009     | 3T | 33 (17F) | 8  | Pain infliction to body part (animated)      | Pain                                         | C/E           | Evaluate whether person is in pain or not | Pain > no pain                                              |

AIR = Automated Image Registration; NR = Not Reported; T = Tesla (field strength MRI scanner)

## BIBLIOGRAPHY

- Akitsuki, Y., and Decety, J. (2009). Social context and perceived agency affects empathy for pain: An event-related fMRI investigation. *NeuroImage* 47, 722-734.
- Arbuckle, N.L., and Shane, M.S. (2017). Up-regulation of neural indicators of empathic concern in an offender population. *Soc Neurosci* 12, 386-390.
- Azevedo, R.T., Macaluso, E., Avenanti, A., Santangelo, V., Cazzato, V., and Aglioti, S.M. (2013). Their pain is not our pain: brain and autonomic correlates of empathic resonance with the pain of same and different race individuals. *Hum Brain Mapp* 34, 3168-3181.
- Azevedo, R.T., Macaluso, E., Viola, V., Sani, G., and Aglioti, S.M. (2014). Weighing the stigma of weight: An fMRI study of neural reactivity to the pain of obese individuals. *NeuroImage* 91, 109-119.
- Aziz-Zadeh, L., Sheng, T., Liew, S.L., and Damasio, H. (2012). Understanding otherness: The neural bases of action comprehension and pain empathy in a congenital amputee. *Cerebral Cortex* 22, 811-819.
- Bagozzi, R.P., Verbeke, W.J.M.I., Dietvorst, R.C., Belschak, F.D., Van Den Berg, W.E., and Rietdijk, W.J.R. (2013). Theory of mind and empathic explanations of Machiavellianism: A neuroscience perspective. *Journal of Management* 39, 1760-1798.
- Benuzzi, F., Lui, F., Duzzi, D., Nichelli, P.F., and Porro, C.A. (2008). Does it look painful or disgusting? Ask your parietal and cingulate cortex. *Journal of Neuroscience* 28, 923-931.
- Berlinger, M., Gallucci, M., Danelli, L., Forgiarini, M., Sberna, M., and Paulesu, E. (2016). Guess who's coming to dinner: Brain signatures of racially biased and politically correct behaviors. *Neuroscience* 332, 231-241.
- Bodden, M.E., Kubler, D., Knake, S., Menzler, K., Heverhagen, J.T., Sommer, J., Kalbe, E., Krach, S., and Dodel, R. (2013). Comparing the neural correlates of affective and cognitive theory of mind using fMRI: Involvement of the basal ganglia in affective theory of mind. *Adv Cogn Psychol* 9, 32-43.

- Bos, P.A., Montoya, E.R., Hermans, E.J., Keysers, C., and Van Honk, J. (2015). Oxytocin reduces neural activity in the pain circuitry when seeing pain in others. *NeuroImage* 113, 217-224.
- Botvinick, M., Jha, A.P., Bylsma, L.M., Fabian, S.A., Solomon, P.E., and Prkachin, K.M. (2005). Viewing facial expressions of pain engages cortical areas involved in the direct experience of pain. *NeuroImage* 25, 312-319.
- Bruneau, E.G., Dufour, N., and Saxe, R. (2012a). Social cognition in members of conflict groups: Behavioural and neural responses in Arabs, Israelis and South Americans to each other's misfortunes. *Philosophical Transactions of the Royal Society B: Biological Sciences* 367, 717-730.
- Bruneau, E.G., Pluta, A., and Saxe, R. (2012b). Distinct roles of the 'Shared Pain' and 'Theory of Mind' networks in processing others' emotional suffering. *Neuropsychologia* 50, 219-231.
- Brunnlieb, C., Münte, T., Tempelmann, C., and Heldmann, M. 2013. Vasopressin modulates neural responses related to emotional stimuli in the right amygdala. *Brain research* [Online], 1499. Available: <http://onlinelibrary.wiley.com/o/cochrane/clcentral/articles/997/CN-00965997/frame.html>.
- Budell, L., Jackson, P., and Rainville, P. (2010). Brain responses to facial expressions of pain: Emotional or motor mirroring? *NeuroImage* 53, 355-363.
- Cheng, Y., Chen, C., Lin, C.P., Chou, K.H., and Decety, J. (2010). Love hurts: An fMRI study. *NeuroImage* 51, 923-929.
- Cheng, Y., Lin, C.P., Liu, H.L., Hsu, Y.Y., Lim, K.E., Hung, D., and Decety, J. (2007). Expertise Modulates the Perception of Pain in Others. *Current Biology* 17, 1708-1713.
- Cheon, B.K., Im, D.M., Harada, T., Kim, J.S., Mathur, V.A., Scimeca, J.M., Parrish, T.B., Park, H., and Chiao, J.Y. (2013). Cultural modulation of the neural correlates of emotional pain perception: The role of other-focusedness. *Neuropsychologia* 51, 1177-1186.
- Chiao, J.Y., Mathur, V.A., Harada, T., and Lipke, T. (2009). "Neural basis of preference for human social hierarchy versus egalitarianism".
- Choe, D.E., Shaw, D.S., and Forbes, E.E. (2015). Maladaptive social information processing in childhood predicts young men's atypical amygdala reactivity to threat. *Journal of child psychology and psychiatry, and allied disciplines* 56, 549-557.
- Coll, M.P., Grégoire, M., Eugène, F., and Jackson, P.L. (2017). Neural correlates of prosocial behavior towards persons in pain in healthcare providers. *Biological Psychology* 128, 1-10.
- Corradi-Dell'acqua, C., Hofstetter, C., and Vuilleumier, P. (2011). Felt and seen pain evoke the same local patterns of cortical activity in insular and cingulate cortex. *Journal of Neuroscience* 31, 17996-18006.
- Danziger, N., Failenot, I., and Peyron, R. (2009). Can we share a pain we never felt? Neural correlates of empathy in patients with congenital insensitivity to pain. *European Journal of Pain* 13, S33.
- Dapretto, M., Davies, M.S., Pfeifer, J.H., Scott, A.A., Sigman, M., Bookheimer, S.Y., and Iacoboni, M. (2006). Understanding emotions in others: mirror neuron dysfunction in children with autism spectrum disorders. *Nat Neurosci* 9, 28-30.
- De Gelder, B., Snyder, J., Greve, D., Gerard, G., and Hadjikhani, N. (2004). Fear fosters flight: A mechanism for fear contagion when perceiving emotion expressed by a whole body. *PNAS* 101, 16701-16706.
- De Greck, M., Scheidt, L., Bolter, A.F., Frommer, J., Ulrich, C., Stockum, E., Enzi, B., Tempelmann, C., Hoffmann, T., Han, S., and Northoff, G. (2012a). Altered brain activity during emotional empathy in somatoform disorder. *Hum Brain Mapp* 33, 2666-2685.

- De Greck, M., Wang, G., Yang, X., Wang, X., Northoff, G., and Han, S. (2012b). Neural substrates underlying intentional empathy. *Social cognitive and affective neuroscience* 7, 135-144.
- Decety, J., and Michalska, K.J. (2010). Neurodevelopmental changes in the circuits underlying empathy and sympathy from childhood to adulthood. *Developmental Science* 13, 886-899.
- Decety, J., Michalska, K.J., and Akitsuki, Y. (2008). Who caused the pain? An fMRI investigation of empathy and intentionality in children. *Neuropsychologia* 46, 2607-2614.
- Decety, J., Michalska, K.J., Akitsuki, Y., and Lahey, B.B. (2009). Atypical empathic responses in adolescents with aggressive conduct disorder: A functional MRI investigation. *Biological Psychology* 80, 203-211.
- Deeley, Q., Daly, E., Surguladze, S., Tunstall, N., Mezey, G., Beer, D., Ambikopathy, A., Robertson, D., Giampietro, V., Brammer, M.J., Clarke, A., Dowsett, J., Fahy, T., Phillips, M.L., and Murphy, D.G. (2006). Facial emotion processing in criminal psychopathy: Preliminary functional magnetic resonance imaging study. *British Journal of Psychiatry* 189, 533-539.
- Dong, D., Ming, Q., Wang, X., Yu, W., Jiang, Y., Wu, Q., Gao, Y., and Yao, S. (2016). Temporoparietal Junction Hypoactivity during Pain-Related Empathy Processing in Adolescents with Conduct Disorder. *Front Psychol* 7, 2085.
- Enzi, B., Amirie, S., and Brune, M. (2016). Empathy for pain-related dorsolateral prefrontal activity is modulated by angry face perception. *Exp Brain Res* 234, 3335-3345.
- Ernst, J., Northoff, G., Boker, H., Seifritz, E., and Grimm, S. (2013). Interoceptive awareness enhances neural activity during empathy. *Hum Brain Mapp* 34, 1615-1624.
- Fan, Y.T., Chen, C., Chen, S.C., Decety, J., and Cheng, Y. (2014). Empathic arousal and social understanding in individuals with autism: evidence from fMRI and ERP measurements. *Social cognitive and affective neuroscience* 9, 1203-1213.
- Feng, C., Li, Z., Feng, X., Wang, L., Tian, T., and Luo, Y.J. (2016). Social hierarchy modulates neural responses of empathy for pain. *Social cognitive and affective neuroscience* 11, 485-495.
- Fourie, M.M., Stein, D.J., Solms, M., Gobodo-Madikizela, P., and Decety, J. (2017). Empathy and moral emotions in post-apartheid South Africa: an fMRI investigation. *Soc Cogn Affect Neurosci* 12, 881-892.
- Fujino, J., Yamasaki, N., Miyata, J., Kawada, R., Sasaki, H., Matsukawa, N., Takemura, A., Ono, M., Tei, S., Takahashi, H., Aso, T., Fukuyama, H., and Murai, T. (2014). Altered brain response to others' pain in major depressive disorder. *Journal of Affective Disorders* 165, 170-175.
- Gao, X., Pan, W., Li, C., Weng, L., Yao, M., and Chen, A. (2017). Long-Time Exposure to Violent Video Games Does Not Show Desensitization on Empathy for Pain: An fMRI Study. *Front Psychol* 8, 650.
- Geday, J., Gjedde, A., Boldsen, A.S., and Kupers, R. (2003). Emotional valence modulates activity in the posterior fusiform gyrus and inferior medial prefrontal cortex in social perception. *NeuroImage* 18, 675-684.
- Geday, J., Kupers, R., and Gjedde, A. (2007). As time goes by: temporal constraints on emotional activation of inferior medial prefrontal cortex. *Cereb Cortex* 17, 2753-2759.
- Göttlich, M., Ye, Z., Rodriguez-Fornells, A., Münte, T.F., and Krämer, U.M. (2017). Viewing socio-affective stimuli increases connectivity within an extended default mode network. *NeuroImage* 148, 8-19.

- Greimel, E., Schulte-Ruther, M., Fink, G.R., Piefke, M., Herpertz-Dahlmann, B., and Konrad, K. (2010). Development of neural correlates of empathy from childhood to early adulthood: an fMRI study in boys and adult men. *J Neural Transm (Vienna)* 117, 781-791.
- Grice-Jackson, T., Critchley, H.D., Banissy, M.J., and Ward, J. (2017). Consciously feeling the pain of others reflects atypical functional connectivity between the pain matrix and frontal-parietal regions. *Frontiers in Human Neuroscience* 11.
- Grosbras, M.H., and Paus, T. (2006). Brain networks involved in viewing angry hands or faces. *Cerebral Cortex* 16, 1087-1096.
- Gu, X., Liu, X., Guise, K.G., Naidich, T.P., Hof, P.R., and Fan, J. (2010). Functional dissociation of the frontoinsula and anterior cingulate cortices in empathy for pain. *Journal of Neuroscience* 30, 3739-3744.
- Gu, X., Liu, X., Van Dam, N.T., Hof, P.R., and Fan, J. (2013). Cognition-emotion integration in the anterior insular cortex. *Cerebral Cortex* 23, 20-27.
- Hadjikhani, N., Zurcher, N.R., Rogier, O., Hippolyte, L., Lemonnier, E., Ruest, T., Ward, N., Lassalle, A., Gillberg, N., Billstedt, E., Helles, A., Gillberg, C., Solomon, P., Prkachin, K.M., and Gillberg, C. (2014). Emotional contagion for pain is intact in autism spectrum disorders. *Transl Psychiatry* 4, e343.
- Han, S., Fan, Y., Xu, X., Qin, J., Wu, B., Wang, X., Aglioti, S.M., and Mao, L. (2009). Empathic neural responses to others' pain are modulated by emotional contexts. *Human Brain Mapping* 30, 3227-3237.
- Han, X., He, K., Wu, B., Shi, Z., Liu, Y., Luo, S., Wei, K., Wu, X., and Han, S. (2017). Empathy for pain motivates actions without altruistic effects: evidence of motor dynamics and brain activity. *Soc Cogn Affect Neurosci* 12, 893-901.
- Horan, W.P., Iacoboni, M., Cross, K.A., Korb, A., Lee, J., Nori, P., Quintana, J., Wynn, J.K., and Green, M.F. (2014). Self-reported empathy and neural activity during action imitation and observation in schizophrenia. *NeuroImage. Clinical* 5, 100-108.
- Jackson, P.L., Latimer, M., Eugene, F., Macleod, E., Hatfield, T., Vachon-Preseu, E., Michon, P.E., and Prkachin, K.M. (2017). Empathy in paediatric intensive care nurses part 2: Neural correlates. *J Adv Nurs* 73, 2686-2695.
- Jankowiak-Siuda, K., Rymarczyk, K., Zurawski, L., Jednorog, K., and Marchewka, A. (2015). Physical attractiveness and sex as modulatory factors of empathic brain responses to pain. *Front Behav Neurosci* 9, 236.
- Jensen, K.B., Petrovic, P., Kerr, C.E., Kirsch, I., Raicek, J., Cheetham, A., Spaeth, R., Cook, A., Gollub, R.L., Kong, J., and Kaptchuk, T.J. (2014). *Sharing pain and relief: Neural correlates of physicians during treatment of patients.*
- Kana, R.K., Patriquin, M.A., Black, B.S., Channell, M.M., and Wicker, B. (2016). Altered Medial Frontal and Superior Temporal Response to Implicit Processing of Emotions in Autism. *Autism Research* 9, 55-66.
- Kanske, P., Böckler, A., Trautwein, F.M., and Singer, T. (2015). Dissecting the social brain: Introducing the EmpaToM to reveal distinct neural networks and brain-behavior relations for empathy and Theory of Mind. *NeuroImage* 122, 6-19.
- Kim, E., Jung, Y.C., Ku, J., Kim, J.J., Lee, H., Kim, S.Y., Kim, S.I., and Cho, H.S. (2009a). Reduced activation in the mirror neuron system during a virtual social cognition task in euthymic bipolar disorder. *Progress in Neuro-Psychopharmacology and Biological Psychiatry* 33, 1409-1416.
- Kim, J.-W., Kim, S.-E., Kim, J.-J., Jeong, B., Park, C.-H., Son, A.R., Song, J.E., and Ki, S.W. (2009b). Compassionate attitude towards others' suffering activates the mesolimbic neural system. *Neuropsychologia* 47, 2073-2081.

- Kim, Y.-T., Lee, J.-J., Song, H.-J., Kim, J.-H., Kwon, D.-H., Kim, M.-N., Yoo, D.-S., Lee, H.J., Kim, H.-J., and Chang, Y. (2010). Alterations in cortical activity of male methamphetamine abusers performing an empathy task: fMRI study. *Human Psychopharmacology: Clinical and Experimental* 25, 63-70.
- Kim, Y.T., Song, H.J., Seo, J.H., Lee, J.J., Lee, J., Kwon, D.H., Yoo, D.S., Lee, H.J., Suh, K.J., and Chang, Y. (2011). The differences in neural network activity between methamphetamine abusers and healthy subjects performing an emotion-matching task: Functional MRI study. *NMR in Biomedicine* 24, 1392-1400.
- Klimecki, O.M., Leiberg, S., Lamm, C., and Singer, T. (2013). Functional neural plasticity and associated changes in positive affect after compassion training. *Cerebral Cortex* 23, 1552-1561.
- Krach, S., Kamp-Becker, I., Einhäuser, W., Sommer, J., Frässle, S., Jansen, A., Rademacher, L., Müller-Pinzler, L., Gazzola, V., and Paulus, F.M. (2015). Evidence from pupillometry and fMRI indicates reduced neural response during vicarious social pain but not physical pain in autism. *Human Brain Mapping* 36, 4730-4744.
- Kramer, U.M., Mohammadi, B., Donamayor, N., Samii, A., and Munte, T.F. (2010). Emotional and cognitive aspects of empathy and their relation to social cognition-An fMRI-study. *Brain Research* 1311, 110-120.
- Labek, K., Berger, S., Buchheim, A., Bosch, J., Spohrs, J., Dommès, L., Beschoner, P., Stingl, J.C., and Viviani, R. (2017). The iconography of mourning and its neural correlates: a functional neuroimaging study. *Soc Cogn Affect Neurosci* 12, 1303-1313.
- Lamm, C., and Decety, J. (2008). Is the extrastriate body area (EBA) sensitive to the perception of pain in others? *Cerebral Cortex* 18, 2369-2373.
- Lang, S., Yu, T., Markl, A., Müller, F., and Kotchoubey, B. (2011). Hearing others' pain: Neural activity related to empathy. *Cognitive, Affective and Behavioral Neuroscience* 11, 386-395.
- Lee, K.H., Brown, W.H., Egleston, P.N., Green, R.D., Farrow, T.F., Hunter, M.D., Parks, R.W., Wilkinson, I.D., Spence, S.A., and Woodruff, P.W. (2006). A functional magnetic resonance imaging study of social cognition in schizophrenia during an acute episode and after recovery. *Am J Psychiatry* 163, 1926-1933.
- Lee, S.J., Kang, D.H., Kim, C.-W., Gu, B.M., Park, J.-Y., Choi, C.-H., Shin, N.Y., Lee, J.-M., and Kwon, J.S. (2010). Multi-level comparison of empathy in schizophrenia: An fMRI study of a cartoon task. *Psychiatry Research: Neuroimaging* 181, 121-129.
- Lee, T.M.C., Sun, D., Leung, M.K., Chu, L.W., and Keysers, C. (2013). Neural activities during affective processing in people with Alzheimer's disease. *Neurobiology of Aging* 34, 706-715.
- Leiberg, S., Eippert, F., Veit, R., and Anders, S. (2012). Intentional social distance regulation alters affective responses towards victims of violence: An FMRI study. *Human Brain Mapping* 33, 2464-2476.
- Lenzi, D., Trentini, C., Pantano, P., Macaluso, E., Lenzi, G.L., and Ammaniti, M. (2013). Attachment models affect brain responses in areas related to emotions and empathy in nulliparous women. *Human Brain Mapping* 34, 1399-1414.
- Luo, S., Li, B., Ma, Y., Zhang, W., Rao, Y., and Han, S. (2015). Oxytocin receptor gene and racial ingroup bias in empathy-related brain activity. *NeuroImage* 110, 22-31.
- Luo, S., Shi, Z., Yang, X., Wang, X., and Han, S. (2014). Reminders of mortality decrease midcingulate activity in response to others' suffering. *Social cognitive and affective neuroscience* 9, 477-486.

- Mascaro, J.S., Hackett, P.D., Gouzoules, H., Lori, A., and Rilling, J.K. (2014). Behavioral and genetic correlates of the neural response to infant crying among human fathers. *Social cognitive and affective neuroscience* 9, 1704-1712.
- Mathur, V.A., Cheon, B.K., Harada, T., Scimeca, J.M., and Chiao, J.Y. (2016). Overlapping neural response to the pain or harm of people, animals, and nature. *Neuropsychologia* 81, 265-273.
- Mathur, V.A., Harada, T., Lipke, T., and Chiao, J.Y. (2010). Neural basis of extraordinary empathy and altruistic motivation. *NeuroImage* 51, 1468-1475.
- Mazza, M., Tempesta, D., Pino, M.C., Catalucci, A., Gallucci, M., and Ferrara, M. (2013). Regional cerebral changes and functional connectivity during the observation of negative emotional stimuli in subjects with post-traumatic stress disorder. *European Archives of Psychiatry and Clinical Neuroscience* 263, 575-583.
- Mazzola, V., Latorre, V., Petito, A., Gentili, N., Fazio, L., Popolizio, T., Blasi, G., Arciero, G., and Bondolfi, G. (2010). Affective response to a loved one's pain: Insula activity as a function of individual differences. *PLoS ONE* 5.
- Melchers, M., Markett, S., Montag, C., Trautner, P., Weber, B., Lachmann, B., Buss, P., Heinen, R., and Reuter, M. (2015). Reality TV and vicarious embarrassment: An fMRI study. *NeuroImage* 109, 109-117.
- Mercadillo, R.E., Alcauter, S., Fernandez-Ruiz, J., and Barrios, F.A. (2015). Police culture influences the brain function underlying compassion: a gender study. *Soc Neurosci* 10, 135-152.
- Mercadillo, R.E., Díaz, J.L., Pasaye, E.H., and Barrios, F.A. (2011). Perception of suffering and compassion experience: Brain gender disparities. *Brain and Cognition* 76, 5-14.
- Michalska, K.J., Kinzler, K.D., and Decety, J. (2013). Age-related sex differences in explicit measures of empathy do not predict brain responses across childhood and adolescence. *Developmental Cognitive Neuroscience* 3, 22-32.
- Molenberghs, P., Gapp, J., Wang, B., Louis, W.R., and Decety, J. (2016). Increased Moral Sensitivity for Outgroup Perpetrators Harming Ingroup Members. *Cereb Cortex* 26, 225-233.
- Moll, J., De Oliveira-Souza, R., Garrido, G.J., Bramati, I.E., Caparelli-Daquer, E.M.A., Paiva, M.L.M.F., Zahn, R., and Grafman, J. (2007). The self as a moral agent: Linking the neural bases of social agency and moral sensitivity. *Social Neuroscience* 2, 336-352.
- Montoya, J.L., Landi, N., Kober, H., Worhunsky, P.D., Rutherford, H.J.V., Mencl, W.E., Mayes, L.C., and Potenza, M.N. (2012). Regional brain responses in nulliparous women to emotional infant stimuli. *PLoS ONE* 7.
- Morelli, S.A., Rameson, L.T., and Lieberman, M.D. (2014). The neural components of empathy: predicting daily prosocial behavior. *Social cognitive and affective neuroscience* 9, 39-47.
- Moriguchi, Y., Decety, J., Ohnishi, T., Maeda, M., Mori, T., Nemoto, K., Matsuda, H., and Komaki, G. (2007). Empathy and judging other's pain: An fMRI study of alexithymia. *Cerebral Cortex* 17, 2223-2234.
- Morrison, I., and Downing, P.E. (2007). Organization of felt and seen pain responses in anterior cingulate cortex. *Neuroimage* 37, 642-651.
- Morrison, I., Lloyd, D., Di Pellegrino, G., and Roberts, N. (2004). Vicarious responses to pain in anterior cingulate cortex: Is empathy a multisensory issue? *Cognitive, Affective and Behavioral Neuroscience* 4, 270-278.
- Morrison, I., Peelen, M.V., and Downing, P.E. (2007). The sight of others' pain modulates motor processing in human cingulate cortex. *Cerebral Cortex* 17, 2214-2222.

- Morrison, I., Tipper, S.P., Fenton-Adams, W.L., and Bach, P. (2013). "Feeling" others' painful actions: The sensorimotor integration of pain and action information. *Human Brain Mapping* 34, 1982-1998.
- Nomi, J.S., Scherfeld, D., Friederichs, S., Schafer, R., Franz, M., Wittsack, H.-J., Azari, N.P., Missimer, J., and Seitz, R.J. (2008). On the neural networks of empathy: A principal component analysis of an fMRI study. *Behavioral and Brain Functions* 4.
- Nummenmaa, L., Hirvonen, J., Parkkola, R., and Hietanen, J.K. (2008). Is emotional contagion special? An fMRI study on neural systems for affective and cognitive empathy. *NeuroImage* 43, 571-580.
- Osborn, J., and Derbyshire, S.W.G. (2010). Pain sensation evoked by observing injury in others. *Pain* 148, 268-274.
- Paulus, F.M., Müller-Pinzler, L., Stolz, D.S., Mayer, A.V., Rademacher, L., and Krach, S. (2017). Laugh or cringe? Common and distinct processes of reward-based schadenfreude and empathy-based fremdscham. *Neuropsychologia*.
- Pehrs, C., Zaki, J., Schlochtermeyer, L.H., Jacobs, A.M., Kuchinke, L., and Koelsch, S. (2017). The Temporal Pole Top-Down Modulates the Ventral Visual Stream During Social Cognition. *Cereb Cortex* 27, 777-792.
- Powell, J.L., Grossi, D., Corcoran, R., Gobet, F., and García-Fiñana, M. (2017). The neural correlates of theory of mind and their role during empathy and the game of chess: A functional magnetic resonance imaging study. *Neuroscience* 355, 149-160.
- Preis, M.A., Schmidt-Samoa, C., Dechent, P., and Kroener-Herwig, B. (2013). The effects of prior pain experience on neural correlates of empathy for pain: An fMRI study. *Pain* 154, 411-418.
- Preston, S.D., Bechara, A., Damasio, H., Grabowski, T.J., Stansfield, R.B., Mehta, S., and Damasio, A.R. (2007). The neural substrates of cognitive empathy. *Social Neuroscience* 2, 254-275.
- Prochnow, D., Brunheim, S., Steinhäuser, L., and Seitz, R.J. (2014). Reasoning about the implications of facial expressions: A behavioral and fMRI study on low and high social impact. *Brain and Cognition* 90, 165-173.
- Prochnow, D., Höing, B., Kleiser, R., Lindenberg, R., Wittsack, H.J., Schäfer, R., Franz, M., and Seitz, R.J. (2013). The neural correlates of affect reading: An fMRI study on faces and gestures. *Behavioural Brain Research* 237, 270-277.
- Regenbogen, C., Schneider, D.A., Gur, R.E., Schneider, F., Habel, U., and Kellermann, T. (2012). Multimodal human communication - Targeting facial expressions, speech content and prosody. *NeuroImage* 60, 2346-2356.
- Reniers, R.L., Vollm, B.A., Elliott, R., and Corcoran, R. (2014). Empathy, ToM, and self-other differentiation: an fMRI study of internal states. *Soc Neurosci* 9, 50-62.
- Riekk, T., Svedholm-Hakkinen, A.M., and Lindeman, M. (2017). Empathizers and systemizers process social information differently. *Soc Neurosci*, 1-12.
- Riem, M.M.E., Bakermans-Kranenburg, M.J., Pieper, S., Tops, M., Boksem, M.a.S., Vermeiren, R.R.J.M., Van Ijzendoorn, M.H., and Rombouts, S.a.R.B. (2011). Oxytocin modulates amygdala, insula, and inferior frontal gyrus responses to infant crying: A randomized controlled trial. *Biological Psychiatry* 70, 291-297.
- Ruckmann, J., Bodden, M., Jansen, A., Kircher, T., Dodel, R., and Rief, W. (2015). How pain empathy depends on ingroup/outgroup decisions: A functional magnetic resonance imaging study. *Psychiatry Research - Neuroimaging* 234, 57-65.
- Schneider, K., Pauly, K.D., Gossen, A., Mevissen, L., Michel, T.M., Gur, R.C., Schneider, F., and Habel, U. (2013). Neural correlates of moral reasoning in autism spectrum disorder. *Social cognitive and affective neuroscience* 8, 702-710.



- Schulte-Rüther, M., Markowitsch, H.J., Shah, N.J., Fink, G.R., and Piefke, M. (2008). Gender differences in brain networks supporting empathy. *NeuroImage* 42, 393-403.
- Seara-Cardoso, A., Sebastian, C.L., Viding, E., and Roiser, J.P. (2016). Affective resonance in response to others' emotional faces varies with affective ratings and psychopathic traits in amygdala and anterior insula. *Soc Neurosci* 11, 140-152.
- Seara-Cardoso, A., Viding, E., Lickley, R.A., and Sebastian, C.L. (2015). Neural responses to others' pain vary with psychopathic traits in healthy adult males. *Cognitive, affective & behavioral neuroscience* 15, 578-588.
- Sebastian, C.L., Fontaine, N.M., Bird, G., Blakemore, S.J., Brito, S.A., Mccrory, E.J., and Viding, E. (2012). Neural processing associated with cognitive and affective Theory of Mind in adolescents and adults. *Social cognitive and affective neuroscience* 7, 53-63.
- Sheng, F., Liu, Q., Li, H., Fang, F., and Han, S. (2014). Task modulations of racial bias in neural responses to others' suffering. *NeuroImage* 88, 263-270.
- Simon-Thomas, E.R., Godzik, J., Castle, E., Antonenko, O., Ponz, A., Kogan, A., and Keltner, D.J. (2012). An fMRI study of caring vs self-focus during induced compassion and pride. *Social cognitive and affective neuroscience* 7, 635-648.
- Simon, D., Craig, K.D., Miltner, W.H., and Rainville, P. (2006). Brain responses to dynamic facial expressions of pain. *Pain* 126, 309-318.
- Singer, T., Seymour, B., O'doherty, J., Kaube, H., Dolan, R.J., and Frith, C.D. (2004). Empathy for Pain Involves the Affective but not Sensory Components of Pain. *Science* 303, 1157-1162.
- Singh, S., Modi, S., Goyal, S., Kaur, P., Singh, N., Bhatia, T., Deshpande, S.N., and Khushu, S. (2015). Functional and structural abnormalities associated with empathy in patients with schizophrenia: An fMRI and VBM study. *Journal of Biosciences* 40, 355-364.
- Spencer, M.D., Holt, R.J., Chura, L.R., Suckling, J., Calder, A.J., Bullmore, E.T., and Baron-Cohen, S. (2011). A novel functional brain imaging endophenotype of autism: the neural response to facial expression of emotion. *Translational psychiatry* 1, e19.
- Szyck, G.R., Mohammadi, B., Munte, T.F., and Te Wildt, B.T. (2017). Lack of Evidence That Neural Empathic Responses Are Blunted in Excessive Users of Violent Video Games: An fMRI Study. *Front Psychol* 8, 174.
- Toller, G., Adhimoolam, B., Grunwald, T., Huppertz, H.J., Kurthen, M., Rankin, K.P., and Jokeit, H. (2015). Right mesial temporal lobe epilepsy impairs empathy-related brain responses to dynamic fearful faces. *Journal of Neurology* 262, 729-741.
- Tusche, A., Bockler, A., Kanske, P., Trautwein, F.M., and Singer, T. (2016). Decoding the Charitable Brain: Empathy, Perspective Taking, and Attention Shifts Differentially Predict Altruistic Giving. *J Neurosci* 36, 4719-4732.
- Ushida, T., Ikemoto, T., Tanaka, S., Shinozaki, J., Taniguchi, S., Murata, Y., Mclaughlin, M., Arai, Y.C., and Tamura, Y. (2008). Virtual needle pain stimuli activates cortical representation of emotions in normal volunteers. *Neurosci Lett* 439, 7-12.
- Vachon-Preseau, E., Roy, M., Martel, M.O., Albouy, G., Chen, J., Budell, L., Sullivan, M.J., Jackson, P.L., and Rainville, P. (2012). Neural processing of sensory and emotional-communicative information associated with the perception of vicarious pain. *NeuroImage* 63, 54-62.
- Van Der Heiden, L., Scherpiet, S., Konicar, L., Birbaumer, N., and Veit, R. (2013). Inter-individual differences in successful perspective taking during pain perception mediates emotional responsiveness in self and others: An fMRI study. *NeuroImage* 65, 387-394.
- Vollm, B.A., Taylor, A.N., Richardson, P., Corcoran, R., Stirling, J., Mckie, S., Deakin, J.F., and Elliott, R. (2006). Neuronal correlates of theory of mind and empathy: a functional magnetic resonance imaging study in a nonverbal task. *Neuroimage* 29, 90-98.

- Wang, Y., Liu, W.H., Li, Z., Wei, X.H., Jiang, X.Q., Neumann, D.L., Shum, D.H., Cheung, E.F., and Chan, R.C. (2015). Dimensional schizotypy and social cognition: an fMRI imaging study. *Front Behav Neurosci* 9, 133.
- Warren, J.E., Sauter, D.A., Eisner, F., Wiland, J., Dresner, M.A., Wise, R.J., and Scott, S.K. (2006). Positive emotions preferentially engage an auditory-motor "mirror" system. *Journal of Neuroscience* 26, 13067-13075.
- Wicker, B., Keysers, C., Plailly, J., Royet, J.P., Gallese, V., and Rizzolatti, G. (2003). Both of us disgusted in My insula: the common neural basis of seeing and feeling disgust *Neuron* 40, 655-664.
- Xu, X., Zuo, X., Wang, X., and Han, S. (2009). Do you feel my pain? Racial group membership modulates empathic neural responses. *Journal of Neuroscience* 29, 8525-8529.
