# Supplementary material for: Is Empathy for Pain Unique in Its Neural Correlates? A Meta-Analysis of Neuroimaging Studies of Empathy
Source: PubMed Central journal article supplement (PMC6277791; doi:10.3389/fnbeh.2018.00289), 2018-11-27
Supplement: Table_2.pdf [file Table_2.pdf]

**TABLE S2 |** Peaks of activation (maximum ALE value) for the brain areas that are consistently activated when contrasting an empathy condition with baseline or a neutral condition. Primary anatomical labels (printed first, starting with a capital letter) are derived from the Talairach Daemon (talairach.org).

| Anatomical label                                        |                                                                | BA | x   | y   | z   | Cluster size <sup>i</sup> |
|---------------------------------------------------------|----------------------------------------------------------------|----|-----|-----|-----|---------------------------|
| <b><i>Empathy (all studies together; 1915 foci)</i></b> |                                                                |    |     |     |     |                           |
| <i>Frontal lobe</i>                                     |                                                                |    |     |     |     |                           |
| L/R                                                     | Medial Frontal Gyrus (mid cingulate, supplementary motor area) | 32 | -4  | 16  | 44  | 10848                     |
| L/R                                                     | Medial Frontal Gyrus                                           | 9  | -2  | 52  | 28  | 808                       |
| L                                                       | Middle Frontal Gyrus                                           | 9  | -52 | 18  | 28  | 48                        |
| R                                                       | Inferior Frontal Gyrus                                         | 13 | 50  | 30  | -2  | 6760                      |
| R                                                       | Inferior Frontal Gyrus                                         | 9  | 52  | 8   | 32  | 5464                      |
| L                                                       | Precentral Gyrus                                               | 6  | -42 | 2   | 44  | 296                       |
| <i>Limbic lobe / subcortical regions</i>                |                                                                |    |     |     |     |                           |
| L/R                                                     | Cingulate Gyrus (mid / posterior)                              | 24 | 0   | -18 | 38  | 432                       |
| L/R                                                     | Cingulate Gyrus (posterior)                                    | 31 | -2  | -58 | 32  | 696                       |
| L                                                       | Insula (anterior, inferior frontal gyrus)                      | 13 | -40 | 12  | -4  | 15224                     |
| R                                                       | Clastrum (anterior/mid insula)                                 |    | 42  | 4   | 0   | 832                       |
| L                                                       | Amygdala                                                       |    | -20 | -8  | -14 | 1672                      |
| R                                                       | Parahippocampal Gyrus / Amygdala                               |    | 22  | -6  | -16 | 2016                      |
| L                                                       | Caudate                                                        |    | -12 | 6   | 12  | 400                       |
| L                                                       | Caudate                                                        |    | -12 | 12  | 2   | 296                       |
| R                                                       | Lentiform Nucleus, Globus Pallidus                             |    | 16  | 6   | 4   | 1016                      |
| L                                                       | Thalamus, Medial Dorsal Nucleus                                |    | -8  | -12 | 10  | 136                       |
| L                                                       | Thalamus, Pulvinar                                             |    | -16 | -26 | 2   | 112                       |
| L/R                                                     | Brainstem (midbrain)                                           |    | -2  | -29 | -6  | 2000                      |
| <i>Parietal lobe</i>                                    |                                                                |    |     |     |     |                           |
| L                                                       | Postcentral Gyrus                                              | 40 | -58 | -22 | 24  | 4952                      |
| L                                                       | Inferior Parietal Lobule                                       | 40 | -38 | -38 | 44  | 96                        |
| L                                                       | Inferior Parietal Lobule                                       | 40 | -38 | -48 | 58  | 88                        |
| L                                                       | Inferior Parietal Lobule                                       | 40 | -60 | -42 | 26  | 16                        |
| R                                                       | Inferior Parietal Lobule                                       | 40 | 62  | -20 | 34  | 3616                      |
| R                                                       | Precuneus                                                      | 7  | 32  | -54 | 58  | 520                       |
| L                                                       | Supramarginal Gyrus                                            | 40 | -52 | -50 | 30  | 16                        |
| <i>Temporal lobe</i>                                    |                                                                |    |     |     |     |                           |
| L                                                       | Fusiform Gyrus                                                 | 37 | -42 | -54 | -20 | 600                       |
| R                                                       | Fusiform Gyrus                                                 | 37 | 48  | -66 | -6  | 7272                      |
| L                                                       | Superior Temporal Gyrus                                        | 38 | -48 | 10  | -36 | 144                       |
| R                                                       | Superior Temporal Gyrus                                        | 22 | 54  | -22 | -10 | 144                       |
| R                                                       | Superior Temporal Gyrus                                        | 22 | 60  | -42 | 10  | 144                       |
| R                                                       | Superior Temporal Gyrus                                        | 38 | 46  | 14  | -36 | 560                       |

|                       |                         |    |     |     |     |      |
|-----------------------|-------------------------|----|-----|-----|-----|------|
| R                     | Superior Temporal Gyrus | 38 | 52  | 8   | -26 | 8    |
| R                     | Middle Temporal Gyrus   |    | 52  | -34 | -2  | 488  |
| <i>Occipital lobe</i> |                         |    |     |     |     |      |
| R                     | Lingual Gyrus           | 18 | 22  | -86 | -6  | 416  |
| L                     | Middle Occipital Gyrus  | 18 | -32 | -92 | 0   | 480  |
| L                     | Middle Occipital Gyrus  | 37 | -48 | -72 | -2  | 5712 |
| R                     | Middle Occipital Gyrus  | 18 | 34  | -84 | 4   | 824  |

Coordinates are in MNI [Montreal Neurologic Institute] space; BA = Brodmann Area; cluster size is in mm<sup>3</sup>. <sup>i</sup> Chosen minimum cluster-size was 8 mm<sup>3</sup>

**TABLE S3 |** Peaks of activation for the brain areas that are consistently activated when contrasting an empathy for pain condition with a baseline or neutral condition; an empathy for non-pain negative affective states with a baseline or neutral condition; and conjunction and contrast analyses to identify commonalities and differences in neural circuitry between the two types of empathy

| Anatomical label                                                        |                                                           | BA | x   | y   | z   | Cluster size <sup>i</sup> |
|-------------------------------------------------------------------------|-----------------------------------------------------------|----|-----|-----|-----|---------------------------|
| <b><i>Empathy for pain (874 foci)</i></b>                               |                                                           |    |     |     |     |                           |
| <i>Frontal lobe</i>                                                     |                                                           |    |     |     |     |                           |
| R                                                                       | Middle Frontal Gyrus                                      | 46 | 50  | 22  | 16  | 32                        |
| R                                                                       | Middle Frontal Gyrus                                      | 6  | 52  | 8   | 42  | 16                        |
| R                                                                       | Inferior Frontal Gyrus                                    | 13 | 38  | 10  | -20 | 8                         |
| R                                                                       | Inferior Frontal Gyrus                                    | 44 | 60  | 12  | 16  | 872                       |
| R                                                                       | Inferior Frontal Gyrus                                    | 47 | 34  | 10  | -22 | 24                        |
| <i>Limbic lobe / subcortical regions</i>                                |                                                           |    |     |     |     |                           |
| L/R                                                                     | Cingulate Gyrus (mid cingulate, supplementary motor area) | 32 | -4  | 20  | 38  | 8712                      |
| L                                                                       | Insula (anterior, inferior frontal gyrus)                 | 13 | -40 | 12  | -6  | 11680                     |
| R                                                                       | Clastrum (mid insula)                                     |    | 42  | 4   | 0   | 4608                      |
| L                                                                       | Parahippocampal Gyrus / Amygdala                          |    | -20 | -6  | -14 | 192                       |
| L                                                                       | Caudate                                                   |    | -12 | 12  | 2   | 256                       |
| R                                                                       | Lentiform Nucleus, Globus Pallidus                        |    | 16  | 6   | 4   | 440                       |
| R                                                                       | Lentiform Nucleus, Globus Pallidus                        |    | 22  | -4  | -14 | 280                       |
| L                                                                       | Thalamus, Pulvinar                                        |    | -4  | -30 | -2  | 432                       |
| L                                                                       | Thalamus, Pulvinar                                        |    | -14 | -26 | 4   | 8                         |
| L/R                                                                     | Brainstem, Substantia Nigra                               |    | -6  | -28 | -18 | 80                        |
| <i>Parietal lobe</i>                                                    |                                                           |    |     |     |     |                           |
| L                                                                       | Postcentral Gyrus                                         | 40 | -58 | -22 | 24  | 5528                      |
| L                                                                       | Inferior Parietal Lobule                                  | 40 | -38 | -48 | 60  | 136                       |
| L                                                                       | Inferior Parietal Lobule                                  | 40 | -38 | -38 | 44  | 56                        |
| R                                                                       | Inferior Parietal Lobule                                  | 40 | 62  | -20 | 34  | 4464                      |
| R                                                                       | Precuneus                                                 | 7  | 32  | -54 | 58  | 1136                      |
| <i>Temporal / occipital lobe</i>                                        |                                                           |    |     |     |     |                           |
| R                                                                       | Fusiform Gyrus                                            | 37 | 48  | -64 | -8  | 3192                      |
| R                                                                       | Superior Temporal Gyrus                                   | 22 | 50  | -34 | 0   | 8                         |
| L                                                                       | Inferior Temporal Gyrus                                   | 37 | -46 | -70 | -2  | 3056                      |
| R                                                                       | Lingual Gyrus                                             | 18 | 18  | -90 | -2  | 96                        |
| L                                                                       | Middle Occipital Gyrus                                    | 18 | -32 | -94 | 0   | 328                       |
| R                                                                       | Middle Occipital Gyrus                                    | 18 | 34  | -86 | 4   | 168                       |
| <i>Cerebellum</i>                                                       |                                                           |    |     |     |     |                           |
| R                                                                       | Cerebellum, posterior lobe                                |    | 36  | -62 | -24 | 128                       |
| <b><i>Empathy for non-pain negative affective states (678 foci)</i></b> |                                                           |    |     |     |     |                           |
| <i>Frontal lobe</i>                                                     |                                                           |    |     |     |     |                           |

|                                                                                                 |                                      |    |     |     |     |      |
|-------------------------------------------------------------------------------------------------|--------------------------------------|----|-----|-----|-----|------|
| L                                                                                               | Medial Frontal Gyrus (mid cingulate) | 32 | -6  | 14  | 48  | 344  |
| R                                                                                               | Medial Frontal Gyrus (mid cingulate) | 6  | 8   | 10  | 50  | 120  |
| L                                                                                               | Medial Frontal Gyrus (anterior)      | 9  | -4  | 52  | 22  | 48   |
| L                                                                                               | Inferior Frontal Gyrus               | 47 | -48 | 28  | -8  | 1208 |
| L                                                                                               | Inferior Frontal Gyrus               | 45 | -54 | 24  | 12  | 208  |
| R                                                                                               | Inferior Frontal Gyrus               |    | 50  | 30  | -4  | 800  |
| R                                                                                               | Inferior Frontal Gyrus               | 46 | 54  | 34  | 12  | 712  |
| L                                                                                               | Superior Frontal Gyrus               | 6  | -6  | 18  | 64  | 64   |
| R                                                                                               | Superior Frontal Gyrus               | 6  | 8   | 12  | 66  | 8    |
| L                                                                                               | Precentral Gyrus                     | 6  | -42 | 2   | 44  | 120  |
| L                                                                                               | Precentral Gyrus                     | 44 | -46 | 20  | 4   | 88   |
| R                                                                                               | Precentral Gyrus                     | 6  | 52  | 8   | 34  | 336  |
| <i>Limbic lobe / subcortical regions</i>                                                        |                                      |    |     |     |     |      |
| L                                                                                               | Clastrum (anterior insula)           |    | -28 | 24  | 2   | 168  |
| L                                                                                               | Parahippocampal Gyrus / Amygdala     |    | -20 | -8  | -16 | 592  |
| R                                                                                               | Parahippocampal Gyrus / Amygdala     |    | 22  | -4  | -16 | 832  |
| L                                                                                               | Caudate                              |    | -12 | 6   | 12  | 272  |
| L                                                                                               | Parahippocampal Gyrus / Amygdala     | 34 | -20 | 0   | -22 | 8    |
| R                                                                                               | Lentiform Nucleus, Globus Pallidus   |    | 14  | 0   | 0   | 8    |
| R                                                                                               | Caudate                              |    | 14  | 4   | 12  | 32   |
| L                                                                                               | Brainstem (midbrain)                 |    | -2  | -30 | -6  | 600  |
| <i>Parietal lobe</i>                                                                            |                                      |    |     |     |     |      |
| L                                                                                               | Inferior Parietal Lobule             | 40 | -60 | -42 | 26  | 8    |
| <i>Temporal / occipital lobe</i>                                                                |                                      |    |     |     |     |      |
| R                                                                                               | Inferior Temporal Gyrus              | 19 | 50  | -56 | 2   | 16   |
| R                                                                                               | Middle Temporal Gyrus                | 37 | 52  | -54 | 4   | 8    |
| L                                                                                               | Middle Temporal Gyrus                | 39 | -52 | -60 | 12  | 8    |
| R                                                                                               | Superior Temporal Gyrus              | 38 | 46  | 14  | -36 | 320  |
| L                                                                                               | Superior Temporal Gyrus              | 38 | -48 | 10  | -34 | 216  |
| R                                                                                               | Fusiform Gyrus                       | 37 | 44  | -48 | -20 | 200  |
| L                                                                                               | Fusiform Gyrus                       | 37 | -42 | -44 | -18 | 104  |
| R                                                                                               | Middle Occipital Gyrus               | 19 | 30  | -92 | 10  | 48   |
| <i>Cerebellum</i>                                                                               |                                      |    |     |     |     |      |
| L                                                                                               | Cerebellum, Anterior Lobe            |    | -34 | -54 | -24 | 32   |
| <b><i>Empathy for pain <math>\cap</math> Empathy for non-pain negative affective states</i></b> |                                      |    |     |     |     |      |
| <i>Frontal lobe</i>                                                                             |                                      |    |     |     |     |      |
| L                                                                                               | Medial Frontal Gyrus (mid cingulate) | 32 | -4  | 16  | 48  | 160  |
| R                                                                                               | Inferior Frontal Gyrus               | 45 | 52  | 32  | -2  | 464  |
| R                                                                                               | Inferior Frontal Gyrus               | 9  | 54  | 8   | 30  | 32   |
| R                                                                                               | Superior Frontal Gyrus               | 6  | 4   | 10  | 54  | 8    |
| R                                                                                               | Superior Frontal Gyrus               | 6  | 8   | 12  | 66  | 8    |

|                                                                                    |                                                 |    |     |     |     |      |
|------------------------------------------------------------------------------------|-------------------------------------------------|----|-----|-----|-----|------|
| L                                                                                  | Precentral Gyrus                                | 44 | -46 | 20  | 4   | 80   |
| <i>Limbic lobe / subcortical regions</i>                                           |                                                 |    |     |     |     |      |
| L                                                                                  | Insula (anterior)                               | 13 | -36 | 22  | -4  | 328  |
| L                                                                                  | Clastrum (anterior insula)                      |    | -28 | 24  | 4   | 80   |
| L                                                                                  | Thalamus, Pulvinar                              |    | -4  | -30 | -4  | 256  |
| R                                                                                  | Lentiform Nucleus, Globus Pallidus              |    | 22  | -4  | -14 | 248  |
| L                                                                                  | Parahippocampal Gyrus / Amygdala                |    | -20 | -6  | -14 | 160  |
| <b><i>Empathy for pain &gt; Empathy for non-pain negative affective states</i></b> |                                                 |    |     |     |     |      |
| <i>Frontal lobe</i>                                                                |                                                 |    |     |     |     |      |
| L                                                                                  | Medial Frontal Gyrus (supplementary motor area) | 6  | 0   | 2   | 68  | 72   |
| L                                                                                  | Precentral Gyrus                                | 6  | -56 | 4   | 34  | 256  |
| <i>Limbic lobe / subcortical regions</i>                                           |                                                 |    |     |     |     |      |
| L/R                                                                                | Cingulate Gyrus (mid cingulate)                 | 24 | -2  | 21  | 36  | 4264 |
| L                                                                                  | Insula (anterior, mid, inferior frontal gyrus)  | 13 | -50 | 5   | 10  | 5496 |
| R                                                                                  | Clastrum (anterior, mid insula)                 |    | 43  | 4   | -3  | 2256 |
| <i>Parietal lobe</i>                                                               |                                                 |    |     |     |     |      |
| L                                                                                  | Postcentral Gyrus                               | 40 | -58 | -25 | 34  | 4328 |
| R                                                                                  | Postcentral Gyrus                               | 40 | 62  | -21 | 29  | 3320 |
| R                                                                                  | Precuneus                                       | 7  | 33  | -48 | 57  | 992  |
| <i>Temporal / occipital lobe</i>                                                   |                                                 |    |     |     |     |      |
| R                                                                                  | Fusiform Gyrus                                  | 37 | 53  | -61 | -9  | 1176 |
| L                                                                                  | Middle Occipital Gyrus                          | 37 | -46 | -64 | -5  | 1232 |
| <b><i>Empathy for non-pain negative affective states &gt; Empathy for pain</i></b> |                                                 |    |     |     |     |      |
| No significant clusters                                                            |                                                 |    |     |     |     |      |

Coordinates are in MNI [Montreal Neurologic Institute] space; BA = Brodmann Area; Cluster size is in mm<sup>3</sup>.<sup>1</sup> Chosen minimum cluster-size was 8 mm<sup>3</sup>

**TABLE S4 |** Peaks of activation for the brain areas that are consistently activated when contrasting an empathy for pain condition using facial pain expressions with a baseline or neutral condition; an empathy for pain condition using acute pain inflictions to body parts with a baseline or neutral condition; and conjunction and contrast analyses to identify commonalities and differences in neural circuitry between these two types of paradigms to elicit empathy for pain

| Anatomical label                                                        |                                                 | BA | x   | y   | z   | Cluster size <sup>i</sup> |
|-------------------------------------------------------------------------|-------------------------------------------------|----|-----|-----|-----|---------------------------|
| <b><i>Empathy for pain using acute pain inflictions (605 foci)</i></b>  |                                                 |    |     |     |     |                           |
| <i>Frontal lobe</i>                                                     |                                                 |    |     |     |     |                           |
| L/R                                                                     | Medial Frontal Gyrus (supplementary motor area) | 6  | 0   | 4   | 64  | 1976                      |
| L                                                                       | Inferior Frontal Gyrus                          | 44 | -52 | 10  | 18  | 2584                      |
| L                                                                       | Inferior Frontal Gyrus                          | 46 | -42 | 42  | 8   | 104                       |
| R                                                                       | Inferior Frontal Gyrus                          | 13 | 38  | 10  | -20 | 112                       |
| R                                                                       | Inferior Frontal Gyrus                          | 44 | 60  | 12  | 14  | 352                       |
| R                                                                       | Inferior Frontal Gyrus                          | 45 | 52  | 32  | 0   | 8                         |
| R                                                                       | Middle Frontal Gyrus                            | 6  | 52  | 8   | 42  | 88                        |
| <i>Limbic lobe / subcortical regions</i>                                |                                                 |    |     |     |     |                           |
| L/R                                                                     | Cingulate Gyrus (mid-cingulate)                 | 32 | -4  | 22  | 36  | 3768                      |
| L                                                                       | Insula (anterior, inferior frontal gyrus)       | 13 | -40 | 12  | -4  | 4920                      |
| R                                                                       | Insula (anterior, inferior frontal gyrus)       | 13 | 38  | 24  | 0   | 3040                      |
| L                                                                       | Insula (mid / posterior)                        | 13 | -40 | -2  | 14  | 64                        |
| R                                                                       | Parahippocampal Gyrus / Amygdala                |    | 22  | -6  | -14 | 64                        |
| R                                                                       | Caudate                                         |    | 14  | 6   | 4   | 112                       |
| R                                                                       | Brainstem, Red Nucleus                          |    | 4   | -28 | -8  | 40                        |
| <i>Parietal lobe</i>                                                    |                                                 |    |     |     |     |                           |
| L                                                                       | Inferior Parietal Lobule                        | 40 | -56 | -26 | 36  | 5432                      |
| L                                                                       | Inferior Parietal Lobule                        | 40 | -38 | -48 | 60  | 280                       |
| R                                                                       | Inferior Parietal Lobule                        | 40 | 62  | -20 | 34  | 4584                      |
| R                                                                       | Precuneus                                       | 7  | 32  | -54 | 58  | 1344                      |
| <i>Temporal / Occipital lobe</i>                                        |                                                 |    |     |     |     |                           |
| R                                                                       | Fusiform Gyrus                                  | 37 | 50  | -64 | -10 | 1112                      |
| L                                                                       | Inferior Temporal Gyrus                         | 37 | -46 | -68 | -2  | 1752                      |
| L                                                                       | Middle Occipital Gyrus                          | 18 | -32 | -94 | 0   | 112                       |
| R                                                                       | Middle Occipital Gyrus                          | 18 | 34  | -86 | 2   | 288                       |
| <i>Cerebellum</i>                                                       |                                                 |    |     |     |     |                           |
| R                                                                       | Cerebellum, Posterior Lobe                      |    | 36  | -64 | -24 | 112                       |
| <b><i>Empathy for pain using facial pain expressions (260 foci)</i></b> |                                                 |    |     |     |     |                           |
| <i>Limbic lobe / subcortical regions</i>                                |                                                 |    |     |     |     |                           |
| L                                                                       | Cingulate Gyrus (mid-cingulate)                 | 32 | -4  | 18  | 42  | 232                       |
| L                                                                       | Insula (anterior)                               | 13 | -40 | 12  | -6  | 40                        |
| <i>Temporal / Occipital lobe</i>                                        |                                                 |    |     |     |     |                           |
| L                                                                       | Inferior Temporal Gyrus                         | 37 | -46 | -74 | 0   | 168                       |

|                                                                         |                                          |    |     |     |    |      |
|-------------------------------------------------------------------------|------------------------------------------|----|-----|-----|----|------|
| R                                                                       | Inferior Temporal Gyrus                  | 37 | 48  | -70 | 0  | 280  |
| <b>Facial pain expressions <math>\cap</math> Acute pain inflictions</b> |                                          |    |     |     |    |      |
| <i>Limbic lobe / subcortical regions</i>                                |                                          |    |     |     |    |      |
| L                                                                       | Cingulate Gyrus (mid-cingulate)          | 32 | -4  | 18  | 42 | 160  |
| L                                                                       | Insula (anterior)                        | 13 | -40 | 12  | -6 | 40   |
| <i>Temporal / Occipital lobe</i>                                        |                                          |    |     |     |    |      |
| L                                                                       | Inferior Temporal Gyrus                  | 37 | -46 | -72 | 0  | 64   |
| R                                                                       | Fusiform Gyrus (inferior temporal gyrus) | 37 | 48  | -64 | -6 | 56   |
| <b>Acute pain inflictions &gt; Facial pain expressions</b>              |                                          |    |     |     |    |      |
| <i>Frontal lobe</i>                                                     |                                          |    |     |     |    |      |
| L/R                                                                     | Medial Frontal Gyrus                     | 8  | 2   | 38  | 40 | 192  |
| <i>Parietal lobe</i>                                                    |                                          |    |     |     |    |      |
| R                                                                       | Superior Parietal Lobule                 | 7  | 36  | -56 | 62 | 176  |
| R                                                                       | Superior Parietal Lobule                 | 7  | 35  | -52 | 64 | 16   |
| L                                                                       | Inferior Parietal Lobule                 | 40 | -51 | -29 | 37 | 1576 |
| R                                                                       | Inferior Parietal Lobule                 | 40 | 57  | -24 | 39 | 2208 |
| <b>Painful facial expressions &gt; Acute pain inflictions</b>           |                                          |    |     |     |    |      |
| No significant clusters                                                 |                                          |    |     |     |    |      |

Coordinates are in MNI [Montreal Neurologic Institute] space; BA = Brodmann Area; Cluster size is in mm<sup>3</sup>. <sup>i</sup> Chosen minimum cluster-size was 8 mm<sup>3</sup>

**TABLE S5 |** Peaks of activation for the brain areas that are consistently activated when contrasting a cognitive/evaluative empathy paradigm with a baseline or neutral condition; a perceptual/affective empathy paradigm with a baseline or neutral condition; and conjunction and contrast analyses to identify commonalities and differences in neural circuitry between these two types of paradigms to elicit empathy

| Anatomical label                                                 |                                                     | BA | x   | y   | z   | Cluster size |
|------------------------------------------------------------------|-----------------------------------------------------|----|-----|-----|-----|--------------|
| <b><i>Cognitive/evaluative empathy paradigms (1129 foci)</i></b> |                                                     |    |     |     |     |              |
| <i>Frontal Lobe</i>                                              |                                                     |    |     |     |     |              |
| L                                                                | Medial Frontal Gyrus                                | 6  | -4  | 54  | 30  | 392          |
| R                                                                | Middle Frontal Gyrus                                | 46 | 54  | 36  | 14  | 40           |
| L                                                                | Inferior Frontal Gyrus                              | 44 | -54 | 12  | 12  | 1408         |
| L                                                                | Inferior Frontal Gyrus                              | 45 | -54 | 24  | 12  | 248          |
| L                                                                | Inferior Frontal Gyrus                              | 47 | -48 | 30  | -8  | 288          |
| R                                                                | Inferior Frontal Gyrus                              | 44 | 58  | 12  | 18  | 704          |
| R                                                                | Inferior Frontal Gyrus                              | 45 | 52  | 30  | -4  | 1536         |
| R                                                                | Inferior Frontal Gyrus                              | 47 | 36  | 30  | -4  | 48           |
| R                                                                | Inferior Frontal Gyrus                              | 6  | 50  | 6   | 32  | 136          |
| <i>Limbic lobe / subcortical regions</i>                         |                                                     |    |     |     |     |              |
| L                                                                | Cingulate Gyrus (anterior, mid)                     | 32 | -2  | 26  | 24  | 8            |
| L                                                                | Cingulate Gyrus (mid, L/R supplementary motor area) | 32 | -4  | 20  | 40  | 5824         |
| L/R                                                              | Cingulate Gyrus (mid, posterior)                    | 24 | 0   | -16 | 38  | 488          |
| L/R                                                              | Cingulate Gyrus (posterior, precuneus)              | 31 | -2  | -58 | 32  | 552          |
| L                                                                | Parahippocampal Gyrus / Amygdala                    |    | -20 | -8  | -16 | 488          |
| R                                                                | Parahippocampal Gyrus / Amygdala                    |    | 22  | -4  | -16 | 208          |
| L                                                                | Insula (anterior)                                   | 13 | -42 | 12  | -6  | 3704         |
| L                                                                | Insula (mid)                                        | 13 | -40 | 0   | 6   | 32           |
| R                                                                | Clastrum (mid / posterior insula)                   |    | 40  | -6  | -8  | 24           |
| R                                                                | Lentiform Nucleus, Globus Pallidus                  |    | 16  | 6   | 4   | 1080         |
| L                                                                | Caudate                                             |    | -12 | 12  | 2   | 648          |
| L                                                                | Thalamus                                            |    | -20 | -26 | -2  | 8            |
| L                                                                | Thalamus                                            |    | -18 | -24 | 0   | 8            |
| L                                                                | Thalamus, Pulvinar (brainstem)                      |    | -4  | -30 | -2  | 760          |
| <i>Parietal lobe</i>                                             |                                                     |    |     |     |     |              |
| L                                                                | Postcentral Gyrus                                   | 40 | -58 | -22 | 24  | 2720         |
| R                                                                | Inferior Parietal Lobule                            | 40 | 62  | -22 | 34  | 1904         |
| R                                                                | Precuneus                                           | 7  | 32  | -54 | 58  | 296          |
| L                                                                | Supramarginal Gyrus                                 | 40 | -52 | -50 | 30  | 40           |
| <i>Temporal / occipital lobe</i>                                 |                                                     |    |     |     |     |              |
| R                                                                | Fusiform Gyrus                                      | 37 | 42  | -54 | -14 | 16           |
| L                                                                | Superior Temporal Gyrus                             | 38 | -48 | 10  | -36 | 312          |
| L                                                                | Superior Temporal Gyrus                             | 39 | -54 | -62 | 22  | 80           |



|                                                          |                                                                 |    |     |     |     |      |
|----------------------------------------------------------|-----------------------------------------------------------------|----|-----|-----|-----|------|
| R                                                        | Superior Temporal Gyrus                                         | 22 | 52  | -32 | -2  | 16   |
| R                                                        | Superior Temporal Gyrus                                         | 38 | 46  | 14  | -36 | 720  |
| L                                                        | Middle Temporal Gyrus                                           | 21 | -60 | -10 | -14 | 8    |
| L                                                        | Middle Temporal Gyrus                                           | 39 | -48 | -66 | 26  | 8    |
| R                                                        | Middle Temporal Gyrus                                           | 37 | 54  | -62 | 0   | 568  |
| L                                                        | Inferior Temporal Gyrus                                         | 37 | -48 | -70 | -2  | 1056 |
| R                                                        | Lingual Gyrus                                                   | 18 | 22  | -86 | -6  | 88   |
| L                                                        | Middle Occipital Gyrus                                          | 18 | -32 | -92 | 2   | 32   |
| R                                                        | Middle Occipital Gyrus                                          | 19 | 30  | -92 | 10  | 256  |
| <i>Cerebellum</i>                                        |                                                                 |    |     |     |     |      |
| L                                                        | Cerebellum, Anterior Lobe                                       |    | -36 | -54 | -24 | 40   |
| R                                                        | Cerebellum, Anterior Lobe                                       |    | 34  | -62 | -26 | 152  |
| <b>Perceptual/affective empathy paradigms (760 foci)</b> |                                                                 |    |     |     |     |      |
| <i>Frontal Lobe</i>                                      |                                                                 |    |     |     |     |      |
| L                                                        | Medial Frontal Gyrus (supplementary motor area)                 | 6  | -2  | 8   | 56  | 40   |
| R                                                        | Medial Frontal Gyrus (mid-cingulate / supplementary motor area) | 6  | 8   | 12  | 52  | 184  |
| L                                                        | Medial Frontal Gyrus                                            | 9  | 2   | 50  | 28  | 8    |
| R                                                        | Middle Frontal Gyrus                                            | 46 | 48  | 22  | 18  | 32   |
| R                                                        | Middle Frontal Gyrus                                            | 6  | 50  | 6   | 40  | 680  |
| R                                                        | Middle Frontal Gyrus                                            | 9  | 56  | 20  | 26  | 16   |
| L                                                        | Inferior Frontal Gyrus                                          | 44 | -50 | 10  | 18  | 216  |
| L                                                        | Inferior Frontal Gyrus                                          | 47 | -38 | 24  | -14 | 2032 |
| L                                                        | Inferior Frontal Gyrus                                          | 9  | -52 | 18  | 26  | 56   |
| R                                                        | Inferior Frontal Gyrus                                          | 44 | 62  | 12  | 14  | 200  |
| L                                                        | Precentral Gyrus                                                | 6  | -58 | 8   | 30  | 224  |
| <i>Limbic lobe / subcortical regions</i>                 |                                                                 |    |     |     |     |      |
| L                                                        | Insula (anterior)                                               | 13 | -32 | 26  | 4   | 136  |
| R                                                        | Insula (anterior)                                               | 13 | 42  | 24  | 0   | 2424 |
| R                                                        | Clastrum (mid cingulate)                                        |    | 42  | 2   | -2  | 88   |
| L                                                        | Amygdala                                                        |    | -20 | -8  | -14 | 616  |
| R                                                        | Parahippocampal Gyrus / Amygdala                                |    | 22  | -6  | -14 | 1264 |
| L/R                                                      | Brainstem, Red Nucleus                                          |    | -4  | -28 | -8  | 824  |
| <i>Parietal lobe</i>                                     |                                                                 |    |     |     |     |      |
| R                                                        | Postcentral Gyrus                                               | 2  | 62  | -20 | 36  | 856  |
| L                                                        | Inferior Parietal Lobule                                        | 40 | -56 | -24 | 36  | 1456 |
| <i>Temporal / occipital lobe</i>                         |                                                                 |    |     |     |     |      |
| L                                                        | Fusiform Gyrus                                                  | 19 | -40 | -80 | -10 | 16   |
| R                                                        | Fusiform Gyrus                                                  | 37 | 44  | -48 | -20 | 344  |
| R                                                        | Fusiform Gyrus                                                  | 37 | 48  | -66 | -8  | 3064 |
| L                                                        | Inferior Temporal Gyrus                                         | 37 | -46 | -70 | -2  | 2104 |

|                                                                                      |                                                 |    |     |     |     |      |
|--------------------------------------------------------------------------------------|-------------------------------------------------|----|-----|-----|-----|------|
| L                                                                                    | Middle Temporal Gyrus                           | 21 | -52 | -50 | 6   | 88   |
| R                                                                                    | Superior Temporal Gyrus                         | 21 | 56  | -22 | -8  | 96   |
| <b>Cognitive/evaluative <math>\cap</math> Perceptual/affective empathy paradigms</b> |                                                 |    |     |     |     |      |
| <i>Frontal Lobe</i>                                                                  |                                                 |    |     |     |     |      |
| L                                                                                    | Medial Frontal Gyrus (supplementary motor area) | 6  | -2  | 8   | 56  | 16   |
| R                                                                                    | Medial Frontal Gyrus (supplementary motor area) | 6  | 6   | 10  | 54  | 8    |
| L                                                                                    | Inferior Frontal Gyrus                          | 44 | -50 | 10  | 16  | 56   |
| L                                                                                    | Inferior Frontal Gyrus                          | 47 | -38 | 22  | -10 | 8    |
| R                                                                                    | Inferior Frontal Gyrus                          | 13 | 48  | 30  | -2  | 672  |
| R                                                                                    | Inferior Frontal Gyrus                          | 44 | 60  | 12  | 14  | 32   |
| L                                                                                    | Precentral Gyrus                                | 44 | -46 | 18  | 2   | 960  |
| R                                                                                    | Precentral Gyrus                                | 6  | 52  | 8   | 34  | 48   |
| <i>Limbic lobe / subcortical regions</i>                                             |                                                 |    |     |     |     |      |
| L                                                                                    | Insula (anterior)                               | 13 | -32 | 26  | 4   | 96   |
| L                                                                                    | Insula (anterior)                               | 13 | -38 | 24  | -2  | 24   |
| L                                                                                    | Amygdala                                        |    | -20 | -8  | -14 | 424  |
| R                                                                                    | Parahippocampal Gyrus / Amygdala                |    | 22  | -4  | -16 | 208  |
| L/R                                                                                  | Brainstem (midbrain)                            |    | -2  | 30  | -6  | 248  |
| <i>Parietal lobe</i>                                                                 |                                                 |    |     |     |     |      |
| R                                                                                    | Postcentral Gyrus                               | 2  | 62  | -20 | 36  | 808  |
| L                                                                                    | Inferior Parietal Lobule                        | 40 | -56 | -24 | 36  | 1296 |
| <i>Temporal / occipital lobe</i>                                                     |                                                 |    |     |     |     |      |
| R                                                                                    | Inferior Temporal Gyrus                         | 37 | 50  | -66 | -4  | 408  |
| L                                                                                    | Middle Occipital Gyrus                          | 37 | -48 | -72 | -2  | 848  |
| <b>Cognitive/evaluative &gt; Perceptual/affective empathy paradigms</b>              |                                                 |    |     |     |     |      |
| No significant clusters                                                              |                                                 |    |     |     |     |      |
| <b>Perceptual/affective &gt; Cognitive/evaluative empathy paradigms</b>              |                                                 |    |     |     |     |      |
| <i>Frontal lobe</i>                                                                  |                                                 |    |     |     |     |      |
| R                                                                                    | Inferior Frontal Gyrus (anterior insula)        | 13 | 43  | 26  | 4   | 32   |

Coordinates are in MNI [Montreal Neurologic Institute] space; BA = Brodmann Area; Cluster size is in mm<sup>3</sup>.<sup>i</sup> Chosen minimum cluster-size was 8 mm<sup>3</sup>

**TABLE S6 |** Peaks of activation for the brain areas that are consistently activated when contrasting a pain-specific cognitive/evaluative empathy paradigm with baseline or neutral condition; a perceptual/affective empathy for pain paradigm with baseline or neutral condition; and conjunction and contrast analyses to identify commonalities and differences in neural circuitry between these two types of paradigms to elicit empathy for pain

| Anatomical label                                                             |                                                 | BA | x   | y   | z   | Cluster size |
|------------------------------------------------------------------------------|-------------------------------------------------|----|-----|-----|-----|--------------|
| <b><i>Cognitive/evaluative paradigms for empathy for pain (508 foci)</i></b> |                                                 |    |     |     |     |              |
| <i>Frontal Lobe</i>                                                          |                                                 |    |     |     |     |              |
| L/R                                                                          | Medial Frontal Gyrus (supplementary motor area) | 6  | 2   | 6   | 62  | 1584         |
| L                                                                            | Middle Frontal Gyrus                            | 10 | -42 | 44  | 8   | 120          |
| R                                                                            | Inferior Frontal Gyrus                          | 44 | 58  | 12  | 16  | 528          |
| R                                                                            | Inferior Frontal Gyrus                          | 45 | 52  | 32  | 0   | 248          |
| R                                                                            | Inferior Frontal Gyrus                          | 47 | 36  | 30  | -4  | 16           |
| <i>Limbic lobe / subcortical regions</i>                                     |                                                 |    |     |     |     |              |
| L                                                                            | Cingulate Gyrus (mid)                           | 32 | -4  | 20  | 38  | 4176         |
| L                                                                            | Insula (anterior, inferior frontal gyrus)       | 13 | -42 | 12  | -6  | 5888         |
| R                                                                            | Insula (anterior, mid)                          |    | 44  | 6   | -2  | 368          |
| R                                                                            | Clastrum                                        |    | 42  | -6  | -8  | 192          |
| R                                                                            | Lentiform Nucleus, Globus Pallidus              |    | 16  | 6   | 4   | 584          |
| L                                                                            | Caudate                                         |    | -14 | 14  | 2   | 288          |
| L/R                                                                          | Thalamus, Pulvinar (brainstem, midbrain)        |    | -4  | -30 | 0   | 152          |
| <i>Parietal lobe</i>                                                         |                                                 |    |     |     |     |              |
| L                                                                            | Postcentral Gyrus                               | 40 | -58 | -22 | 24  | 3800         |
| R                                                                            | Inferior Parietal Lobule                        | 40 | 62  | -22 | 34  | 2368         |
| R                                                                            | Precuneus                                       | 7  | 32  | -54 | 58  | 688          |
| <i>Temporal / occipital lobe</i>                                             |                                                 |    |     |     |     |              |
| R                                                                            | Fusiform Gyrus                                  | 37 | 52  | -62 | -10 | 152          |
| L                                                                            | Inferior Temporal Gyrus                         | 37 | -46 | -68 | 0   | 264          |
| L                                                                            | Middle Occipital Gyrus                          | 18 | -32 | -94 | 0   | 64           |
| <i>Cerebellum</i>                                                            |                                                 |    |     |     |     |              |
| R                                                                            | Cerebellum, Posterior Lobe                      |    | 36  | -64 | -24 | 64           |
| <b><i>Perceptual/affective paradigms for empathy for pain (344 foci)</i></b> |                                                 |    |     |     |     |              |
| <i>Frontal Lobe</i>                                                          |                                                 |    |     |     |     |              |
| L                                                                            | Medial Frontal Gyrus                            | 8  | -4  | 34  | 38  | 16           |
| L                                                                            | Inferior Frontal Gyrus                          | 44 | -50 | 10  | 18  | 272          |
| L                                                                            | Precentral Gyrus                                | 6  | -58 | 8   | 30  | 272          |
| <i>Limbic lobe / subcortical regions</i>                                     |                                                 |    |     |     |     |              |
| L                                                                            | Insula (anterior, inferior frontal gyrus)       | 13 | -32 | 26  | 4   | 16           |
| R                                                                            | Insula (anterior, inferior frontal gyrus)       | 13 | 40  | 24  | 0   | 616          |
| L                                                                            | Clastrum (anterior, mid insula)                 |    | -38 | 12  | -2  | 216          |

|                                                                                          |                                          |    |     |     |     |      |
|------------------------------------------------------------------------------------------|------------------------------------------|----|-----|-----|-----|------|
| R                                                                                        | Clastrum (mid insula)                    |    | 42  | 2   | -2  | 232  |
| R                                                                                        | Parahippocamal Gyrus / Amygdala          |    | 22  | -6  | -14 | 448  |
| L                                                                                        | Parahippocamal Gyrus / Amygdala          |    | -22 | -6  | -14 | 72   |
| L/R                                                                                      | Brainstem (midbrain)                     |    | 2   | -30 | -8  | 208  |
| <i>Parietal lobe</i>                                                                     |                                          |    |     |     |     |      |
| L                                                                                        | Inferior Parietal Lobule                 | 40 | -56 | -24 | 36  | 1280 |
| R                                                                                        | Inferior Parietal Lobule                 | 40 | 62  | -20 | 34  | 976  |
| <i>Temporal / occipital lobe</i>                                                         |                                          |    |     |     |     |      |
| R                                                                                        | Fusiform Gyrus                           | 37 | 48  | -64 | -8  | 1560 |
| L                                                                                        | Inferior Temporal Gyrus                  | 37 | -44 | -70 | -4  | 1384 |
| <i>Cerebellum</i>                                                                        |                                          |    |     |     |     |      |
| R                                                                                        | Cerebellum, Posterior Lobe               |    | 16  | -76 | -50 | 8    |
| <b><i>Cognitive/evaluative ∩ Perceptual/affective paradigms for empathy for pain</i></b> |                                          |    |     |     |     |      |
| <i>Frontal Lobe</i>                                                                      |                                          |    |     |     |     |      |
| L                                                                                        | Inferior Frontal Gyrus                   | 44 | -50 | 10  | 16  | 152  |
| <i>Limbic lobe / subcortical regions</i>                                                 |                                          |    |     |     |     |      |
| L                                                                                        | Clastrum                                 |    | -38 | 12  | -2  | 208  |
| R                                                                                        | Clastrum                                 |    | 42  | 4   | 0   | 24   |
| <i>Parietal lobe</i>                                                                     |                                          |    |     |     |     |      |
| L                                                                                        | Inferior Parietal Lobule                 | 40 | -56 | -24 | 36  | 1232 |
| R                                                                                        | Inferior Parietal Lobule                 | 40 | 62  | -20 | 34  | 960  |
| <i>Temporal / occipital lobe</i>                                                         |                                          |    |     |     |     |      |
| R                                                                                        | Fusiform Gyrus                           | 37 | 50  | -64 | -10 | 88   |
| L                                                                                        | Inferior Temporal Gyrus                  | 37 | -46 | -68 | 0   | 240  |
| <b><i>Cognitive/evaluative &gt; Perceptual/affective</i></b>                             |                                          |    |     |     |     |      |
| L                                                                                        | Cingulate Gyrus (mid)                    | 32 | -7  | 20  | 41  | 216  |
| <b><i>Perceptual/affective &gt; Cognitive/evaluative</i></b>                             |                                          |    |     |     |     |      |
| R                                                                                        | Inferior Frontal Gyrus (anterior insula) | 13 | 43  | 26  | 4   | 32   |

Coordinates are in MNI [Montreal Neurologic Institute] space; BA = Brodmann Area; Cluster size is in mm<sup>3</sup>.<sup>1</sup> Chosen minimum cluster-size was 8 mm<sup>3</sup>
